# Supplementary material for: Integrated Transcriptome and Metabolome Analyses Provide Insights into the Coloring Mechanism of Dark-red and Yellow Fruits in Chinese Cherry [Cerasus pseudocerasus (Lindl.) G. Don]
Source: Int J Mol Sci. 2023 Feb 9;24(4):3471. doi: 10.3390/ijms24043471 (PMC9965709; doi:10.3390/ijms24043471)
Supplement: Supplementary file 1 [file ijms-24-03471-s001.zip › Proof Supplementary Tables 20230208.xlsx]

## Sheet: Table S1
Supplementary Table S1. Overview of RNA-seq data in dark-red and yellow fruits of Chinese cherry
Sample	Clean Reads No.	Clean Data (bp)	GC (%)	Q20 (%)	Mapped data (%)
HP31S1-1	46780236	7017035400	46.95	97.08	92.4
HP31S1-2	45834076	6875111400	47.31	97.15	92.25
HP31S1-3	47530958	7129643700	46.54	94.74	88.9
HP31S2-1	46777958	7016693700	50.13	97.08	90.25
HP31S2-2	45286850	6793027500	50.43	94.23	85.89
HP31S2-3	46648734	6997310100	51.72	94.75	86.21
HP31S3-1	45427016	6814052400	47.66	97.18	92.4
HP31S3-2	46930946	7039641900	49.21	97.25	91.54
HP31S3-3	48072096	7210814400	47.36	97.15	91.94
HP31S4-1	45898434	6884765100	46.97	97.12	92.6
HP31S4-2	47716662	7157499300	47.21	97.3	92.94
HP31S4-3	45597372	6839605800	47.73	97.11	91.95
HP31S5-1	47163192	7074478800	47.36	97.02	92.69
HP31S5-2	47809240	7171386000	47.49	97.19	92.97
HP31S5-3	43784296	6567644400	47.59	97.11	92.4
HFS1-1	46931478	7039721700	47.1	97.28	91.83
HFS1-2	44255732	6638359800	46.85	94.25	85.65
HFS1-3	47594646	7139196900	46.9	95.01	88.73
HFS2-1	46420378	6963056700	47.24	97.06	92.5
HFS2-2	46433034	6964955100	47.11	94.12	87.79
HFS2-3	46774988	7016248200	46.7	94.89	89.11
HFS3-1	47478146	7121721900	47.47	97.06	90.26
HFS3-2	47337084	7100562600	47.39	97.16	91
HFS3-3	42885090	6432763500	47.5	97.15	90.89
HFS4-1	47497948	7124692200	47.04	97.04	91.32
HFS4-2	47619162	7142874300	47.37	97.22	91.34
HFS4-3	47503072	7125460800	47.68	97.24	91.2
HFS5-1	47673666	7151049900	47.46	96.89	91.23
HFS5-2	43347256	6502088400	47.39	97.34	91.31
HFS5-3	47302728	7095409200	47.78	97.22	91.66
HP5S1-1	47590224	7138533600	47.72	97.15	91.88
HP5S1-2	42683830	6402574500	47.77	94.17	87.58
HP5S1-3	47858512	7178776800	47.61	94.67	88.76
HP5S2-1	47483202	7122480300	47.71	97.32	91.92
HP5S2-2	47059004	7058850600	47.26	93.86	86.65
HP5S2-3	47748108	7162216200	47.45	94.61	88.59
HP5S3-1	47588628	7138294200	47.48	96.96	90.84
HP5S3-2	48045082	7206762300	47.39	97.01	90.63
HP5S3-3	47189406	7078410900	47.57	97.16	91.4
HP5S4-1	47125810	7068871500	46.55	96.89	92.42
HP5S4-2	47766648	7164997200	46.83	97.15	92.11
HP5S4-3	48104774	7215716100	47.03	97.17	92.35
HP5S5-1	42151566	6322734900	47.21	96.81	91.64
HP5S5-2	47632942	7144941300	47.31	97.32	91.91
HP5S5-3	47982204	7197330600	47.28	97.23	92.31
PZBS1-1	47745072	7161760800	48.33	97.12	91.8
PZBS1-2	46684038	7002605700	48.23	94.6	89.12
PZBS1-3	47097666	7064649900	48.28	97	92.27
PZBS2-1	47284852	7092727800	47.69	97.06	91.67
PZBS2-2	46436284	6965442600	47.76	94.69	88.24
PZBS2-3	41582094	6237314100	47.05	96.89	90.99
PZBS3-1	47256462	7088469300	47.05	97.19	92.05
PZBS3-2	47700318	7155047700	46.93	97.19	92.15
PZBS3-3	46894346	7034151900	47.64	96.59	91.14
PZBS4-1	47484086	7122612900	46.79	97.22	92.83
PZBS4-2	46428176	6964226400	46.56	97.08	90.85
PZBS4-3	46739308	7010896200	46.91	96.61	89.72
PZBS5-1	47457300	7118595000	47.26	97.36	92.77
PZBS5-2	47673352	7151002800	47.29	97.11	92.3
PZBS5-3	47234814	7085222100	47.6	96.62	92.21

## Sheet: Table S2
Supplementary Table S2. The expression levels of genes in the MEblack module from WGCNA analysis
Gene_id	Description	HP31																HF																HP5
		S1-1	S1-2	S1-3	S2-1	S2-2	S2-3	S3-1	S3-2	S3-3	S4-1	S4-2	S4-3	S5-1	S5-2	S5-3		S1-1	S1-2	S1-3	S2-1	S2-2	S2-3	S3-1	S3-2	S3-3	S4-1	S4-2	S4-3	S5-1	S5-2	S5-3		S1-1	S1-2	S1-3	S2-1	S2-2	S2-3	S3-1	S3-2	S3-3	S4-1	S4-2	S4-3	S5-1	S5-2	S5-3
MSTRG.11639	Arabinogalactan peptide 23	0.656568	1.21907	1.21908	0.898602	1.38671	0.238874	8.46068	10.2872	6.67834	28.3194	58.9741	26.2212	46.7017	67.0237	62.7278		0	0.085491	0.075239	0.645163	0.092336	0.498943	2.18723	1.98673	1.01298	5.45695	25.2377	14.9911	11.7174	10.8763	32.1235		0.10563	0	0.394715	0.535211	2.03186	1.05283	15.0948	2.67922	2.2327	40.1338	54.2103	53.8372	58.227	62.9495	44.2341
MSTRG.13492	Putative expansin-B2	0	0	0	0	0	0	0.109423	0.273333	0.208755	1.28849	4.10569	4.77831	34.3699	23.644	16.7653		0.052773	0	0.053957	0.156048	0.08495	0	1.30449	1.96361	1.10347	4.4187	12.2499	21.4664	53.912	45.896	25.0088		0	0	0	0	0.112032	0.135028	4.27726	2.78894	2.14583	34.5944	63.2921	51.5352	85.3582	115.656	48.7053
MSTRG.13783	Receptor-like protein EIX2	20.1635	19.3222	21.0688	11.5446	8.23334	6.49396	9.62861	8.27211	10.83	53.3454	28.0935	35.9083	54.4956	51.5078	49.9469		10.8522	7.44951	10.3228	8.30269	9.15172	8.59209	8.87069	8.80806	11.5334	7.50033	8.29614	9.66066	8.80279	11.2342	12.5931		11.0265	12.8992	10.8218	8.29037	7.79039	8.28246	4.35924	5.23816	6.18515	11.3464	11.4414	11.7037	7.15798	7.37073	7.1571
MSTRG.13804	Homeobox-leucine zipper protein ANTHOCYANINLESS 2	20.7262	19.6562	20.4653	6.5732	6.14065	5.15558	20.328	12.8031	17.2547	40.6788	42.6422	53.3403	47.0442	47.0057	45.782		6.87676	5.01749	5.0044	12.9315	11.0753	13.3626	9.52338	7.27133	9.11693	20.7393	23.1949	20.5543	12.9655	9.41956	11.065		10.0723	9.95331	9.68604	7.57636	7.80143	7.37304	14.4402	21.3997	13.4281	27.7689	26.8046	26.727	24.3127	23.7135	21.7884
MSTRG.14004	Receptor-like protein EIX2	0.463108	0.891876	0.287177	0.367375	0.167011	0.031138	1.45135	2.28725	1.56376	4.53258	4.15232	2.75252	2.44548	2.35831	0.256434		0.063425	0.30055	0.333198	1.50761	1.11282	1.29757	1.19913	0.613963	0.733204	2.04607	2.06847	1.58801	2.75384	1.43771	0.807691		3.48486	1.03995	2.04772	2.0597	0.958326	1.7205	11.8199	9.68381	2.9087	13.2362	13.039	8.86389	9.10214	7.83321	10.0226
MSTRG.14109	Protein SUPPRESSOR OF PHYA-105	3.80877	3.50585	4.39939	1.84966	1.72789	0.98082	1.00106	0.766361	1.4925	14.3904	9.3025	13.81	8.83092	10.3808	11.9889		2.86887	3.17589	3.21421	1.57414	2.34604	2.20414	2.09917	1.87118	1.97249	3.78815	6.80112	5.2912	16.0364	7.79848	10.1131		4.30525	2.94666	4.30372	2.99752	2.98819	3.25868	2.18833	1.69381	1.17425	18.4955	11.4879	13.3396	15.2023	20.8299	19.056
MSTRG.14642	Glutathione S-transferase L2	3.93502	3.97247	4.76376	2.34301	2.04463	2.03745	1.88919	1.32138	1.94288	19.4659	11.1992	14.5365	9.22327	8.08196	9.2652		4.98559	5.71294	6.14029	6.59705	7.27445	6.00767	3.81703	4.77072	3.64202	2.11428	1.85192	1.50738	1.18101	1.65324	1.34022		4.73041	5.40142	4.93593	4.13354	4.6127	4.37502	3.89295	3.45205	3.28356	26.0029	19.6898	16.7325	18.7547	25.8667	20.0127
MSTRG.14693	Chalcone isomerase	23.9143	17.6491	10.7826	8.68298	6.25441	6.67311	34.3852	11.2468	14.2464	107.587	62.5136	74.6622	294.392	323.104	388.014		6.53902	7.25181	5.94186	5.85801	5.04785	5.22706	5.78535	6.11952	6.52346	25.1931	99.3394	17.586	155.617	269.783	252.917		12.6108	9.75965	6.88153	8.6274	23.7369	11.3437	13.2057	16.9583	19.2572	76.6767	143.888	104.837	114.26	133.134	125.887
MSTRG.14953	UDP-glycosyltransferase 76F1	1.26549	0.965052	0.974027	0.500803	0.359031	0.307523	3.14103	2.67671	3.08424	30.9948	36.6529	41.8251	13.0521	25.6309	40.2795		0	0	0	0.004354	0.007831	0	0.027039	0.042778	0.077889	0.162207	0.011872	0.007153	0.932289	0.255637	0.511141		0.509608	0.905325	1.09403	0.393174	0.379558	0.426551	3.67023	6.84906	1.4025	95.693	122.665	147.984	126.443	123.195	119.612
MSTRG.15194	Chalcone isomerase 3	106.199	99.6054	95.8128	35.5603	36.7065	20.2355	88.6128	49.8233	64.9802	779.095	606.966	899.09	2127.37	2148.46	2039.12		27.1394	27.7094	28.9619	31.6798	35.8266	33.964	31.91	34.1063	39.5503	377.136	333.822	341.729	1271.62	776.838	1059.21		21.8496	27.5218	24.8312	44.2604	43.9645	48.3185	63.6773	78.55	50.8391	863.698	1491.64	1187.78	1021.33	1065.7	1028.74
MSTRG.15900	Anthocyanidin 3-O-glucosyltransferase 2	2.62705	3.14714	3.29929	0.967088	0.992618	0.700611	92.3139	49.0287	65.8348	616.494	624.925	868.685	1889.49	1574.46	1889.43		0.413677	0.433536	0.31447	4.26973	3.56911	3.64449	10.0284	25.1102	17.6001	335.654	309.555	326.48	1146.03	713.274	911.915		0.16415	0.336367	0.283503	0.452448	0.445722	0.32379	47.1454	42.4921	11.0432	785.761	1111.58	1003.13	957.702	1092.11	1153.01
MSTRG.15909	D-xylose-proton symporter-like 2	29.7766	26.7245	26.8577	17.0517	14.3889	9.60311	15.7567	13.9092	17.901	37.0109	28.3263	34.0573	72.5487	59.1623	60.0879		23.7987	22.2109	24.0566	19.1192	18.7229	19.2375	17.5701	17.4231	18.0895	30.0241	32.7776	32.1048	53.8701	45.2531	46.4784		30.5989	25.3984	29.0644	29.1093	29.0752	32.7129	19.2826	18.9212	16.8316	46.4605	52.8177	46.1267	40.0824	44.617	42.5756
MSTRG.16110	Phytoene synthase, chloroplastic	134.348	131.233	129.614	60.1403	57.3517	37.7048	197.983	159.748	235.912	387.583	562.424	358.266	727.583	825.152	791.025		59.3341	56.1657	54.7344	102.287	97.0168	105.171	204.992	180.643	165.215	526.476	516.361	563.829	732.97	1490.33	767.461		93.0575	105.538	92.4529	72.8627	75.7157	76.5966	260.581	148.358	135.988	690.343	868.698	815.542	1063.56	964.924	1048.77
MSTRG.16122	Glutathione S-transferase F12	0.48759	0.472722	0.766056	0.474983	0.804447	0.491158	166.004	79.8163	119.425	528.19	270.299	864.44	2895.01	2949.22	2818.13		0.093448	0.355201	0.284871	0.647125	0.349657	0.331363	4.95975	15.6703	11.2881	212.984	229.234	206.57	1355.69	903.47	910.709		0	0.1594	0	0.535002	0.171765	0.260103	94.898	68.2116	14.9102	475.241	644.827	834.784	1417.48	1527.7	1638.76
MSTRG.16138	Sucrose synthase 7	17.9918	16.3317	16.7367	9.98222	7.4608	3.76102	7.82238	5.6171	9.99068	32.7581	32.4833	33.6289	38.6561	38.0374	32.3092		13.8079	12.9099	14.3554	9.39717	11.1591	10.5597	12.4651	12.5852	10.878	26.7124	20.7178	18.0059	36.0085	25.4369	29.1611		11.8699	8.13523	8.08005	13.7684	13.9982	14.6343	5.97434	7.88023	6.9117	21.6436	28.5186	23.9895	16.4007	17.614	15.1883
MSTRG.1697	Chalcone synthase	25.3775	17.1109	27.7228	5.6777	4.06234	3.35744	13.0312	2.83506	7.00823	115.227	74.0804	201.293	1056.48	798.919	754.181		10.0493	5.37348	6.00703	1.58522	1.23068	1.51517	0.789206	1.23656	0.549769	99.5153	79.4977	66.6738	444.639	285.788	356.082		1.00882	2.45211	1.04713	3.56504	1.84882	3.52152	10.8699	13.9141	1.0956	248.109	485.363	570.643	343.473	295.376	282.841
MSTRG.1698	Chalcone synthase	30.3689	31.0017	31.5519	7.17173	4.84612	3.57948	8.0915	2.52372	3.70344	85.8866	35.0676	67.0035	286.701	329.579	285.052		6.91309	4.77829	4.29936	2.45591	2.30209	2.23521	0.625657	1.10183	1.03249	63.6368	65.2409	31.7717	96.9143	114.416	160.202		4.11864	2.67711	2.98121	5.80662	3.86237	5.09535	5.43881	8.35583	1.4456	69.8576	111.578	119.402	101.052	102.245	93.26
MSTRG.17416	Protein LOW PSII ACCUMULATION 3, chloroplastic	1.61393	3.0593	2.23525	1.69089	1.19495	1.47153	4.34107	6.1771	3.51051	19.3723	13.1108	20.6034	10.6328	10.5328	13.5619		1.13023	1.07727	1.51946	1.33197	1.37379	1.48925	0.701877	1.499	1.04623	4.70642	7.89131	9.63883	8.87834	5.10706	8.57133		3.21605	3.8424	4.65784	2.96967	3.04081	2.00897	13.2168	4.33544	7.86009	28.2153	30.4857	27.3651	19.0899	21.6532	25.5111
MSTRG.17418	Putative cyclic nucleotide-gated ion channel 8	0.417254	0.519553	0.927548	0.786423	0.369926	0.360992	0.746594	0.34817	0.607963	9.33256	4.76165	8.01306	6.23343	8.38922	8.35726		0.273915	0.35196	0.240104	0.667212	1.06575	1.05052	0.224168	0.100435	0.056064	1.40816	1.35309	2.07704	4.03548	2.80524	3.77486		1.30799	0.673801	1.18932	0.345057	0.440599	0.267777	5.32778	0.486964	0.455238	13.6256	15.6264	14.329	12.9753	13.5511	14.4084
MSTRG.18398	Uncharacterized protein	0.365762	0.213989	0.4453	0	0	0.060339	0.737277	0.407602	0.559152	6.22318	2.54594	6.06377	5.3444	3.03535	7.6052		0.040828	0.103268	0.065757	0.116406	0.400842	0	0.622173	0.415258	0.847254	5.67067	4.96788	6.88234	9.80561	7.86755	8.25772		0.348034	0.152207	0	0.331384	0.167071	0.13707	0.98786	0.797062	0.362489	17.6723	9.76298	16.817	12.0116	7.28345	9.33462
MSTRG.18742	R2-R3 MYB10/75like/114like	7.73517	7.81559	10.3455	5.65839	3.06386	2.41452	27.2668	21.455	18.2813	143.415	119.758	172.279	169.54	116.626	107.576		3.30363	3.3473	3.84279	12.3681	5.22661	7.56789	12.8246	15.8983	14.0946	115.27	90.5911	88.4328	142.933	123.653	118.883		14.8855	6.12106	4.90657	8.43074	5.64802	3.97838	31.3834	40.2902	24.4786	201.768	222.188	204.1	234.127	250.348	232.151
MSTRG.19335	Aspartic proteinase A1	177.923	157.693	168.586	114.502	102.365	66.2608	115.093	88.2907	119.976	191.626	156.908	151.277	295.893	254.71	268.278		103.879	99.5406	102.843	126.827	137.088	140.337	108.678	109.027	118.992	142.601	141.937	153.587	151.948	129.783	152.132		130.378	109.208	117.35	161.484	147.496	166.622	97.5185	130.566	115.539	133.178	142.581	136.908	167.973	196.625	156.102
MSTRG.20258	Putative pentatricopeptide repeat-containing protein	2.10608	2.1424	1.86478	1.13813	0.764269	0.805438	4.78164	2.89113	2.66159	10.3734	7.51046	10.8684	3.93596	3.46008	4.69566		1.39099	1.19629	1.84982	0.963489	1.15919	0.829947	1.15992	1.03021	1.2584	2.9177	2.96235	3.39394	2.17544	1.56348	1.8455		3.14034	3.02403	3.06837	2.96473	2.30218	2.65381	14.5514	5.42579	3.39556	13.8469	13.5571	13.4718	12.4519	11.9412	13.3205
MSTRG.21616	Cysteine proteinase RD21A	555.137	567.645	564.052	300.018	290.897	196.313	569.612	457.817	622.2	1170.92	1220.25	1111.8	1648.18	1695.5	1322.72		246.404	237.295	235.3	367.381	375.609	387.628	583.655	534.768	647.163	485.676	632.174	942.724	443.408	351.653	539.694		344.315	303.16	336.938	400.111	460.954	465.631	683.342	695.174	676.142	819.848	1111.74	962.297	598.33	586.222	483.919
MSTRG.22018	E3 ubiquitin-protein ligase WAV3-like	11.4091	10.7485	11.275	5.72872	5.5549	4.16374	10.9914	7.28782	10.3779	14.1156	20.1446	16.5843	33.7424	35.4474	38.215		7.01922	7.16411	6.94637	13.765	13.8118	13.928	13.8061	14.9279	16.8676	15.9826	21.0213	23.3202	26.7833	32.0487	30.8862		5.51623	5.5849	6.63888	8.74786	9.88362	8.10177	10.6216	14.8949	10.795	22.4273	25.4167	24.6781	24.5807	25.0696	26.2284
MSTRG.23681	Flavonoid 3'-monooxygenase	7.07175	7.35525	7.10372	3.29068	3.56584	3.29359	2.84272	2.15494	2.28292	9.18638	10.8271	11.7752	23.6655	23.4182	19.6006		2.91504	4.65115	2.99552	1.76874	2.06385	1.66168	0.917892	1.02353	0.9432	3.33982	3.03512	3.07338	9.87239	7.59993	8.53723		2.99445	4.92572	4.03719	2.62991	3.22098	3.56122	1.67745	1.37233	1.3095	5.78859	9.00723	8.32232	4.97349	6.04442	5.28614
MSTRG.23682	Flavonoid 3'-monooxygenase	7.01506	7.29629	7.04678	3.2643	3.53726	3.26719	2.81993	2.13766	2.26462	9.11274	10.7403	11.6809	23.4758	23.2398	19.4435		2.89168	4.61387	2.97151	1.75456	2.04731	1.64836	0.910534	1.01533	0.93564	3.32152	3.01079	3.04874	9.79325	7.53901	8.46879		2.97045	4.88624	4.00483	2.60883	3.19516	3.53267	1.664	1.36133	1.299	5.74219	8.93503	8.24599	4.93363	5.99596	5.24377
MSTRG.24203	Pathogenesis-related protein P2	1.1764	0.445039	0.818617	1.07498	0.947505	0.446849	1.9142	1.3932	2.05902	1.57747	2.36884	3.06197	2.90363	3.33487	3.13432		2.23761	3.06184	1.49674	1.24594	1.40847	1.23765	1.50049	1.44118	0.891435	6.57555	5.62172	7.65398	10.7153	9.30845	10.0639		0.176436	0.133381	0.339514	0.562837	0.698252	0.548921	1.28988	2.59299	2.98984	9.7193	20.0577	14.7146	20.7933	13.5541	13.6121
MSTRG.24593	Glucan endo-1,3-beta-glucosidase	2.10981	2.18623	2.53098	0.901406	1.18917	0.438798	6.61696	5.62367	8.65266	80.1886	76.9023	138.186	98.5353	70.4566	79.4734		0.208185	0.661301	0.274235	4.43854	3.4134	5.08213	9.7728	15.5152	13.9802	41.0583	49.8598	105.962	145.554	172.42	87.6172		0.072452	0.481341	0.563828	0.220655	1.13552	0.517711	61.5285	27.4181	12.3869	1236.91	1500.86	1286.15	1499.28	1881.38	1763.43
MSTRG.2633	Major allergen Pru ar 1	45.0954	39.2738	42.0971	24.2368	21.2912	10.666	17.4594	11.7353	12.9505	48.8838	36.4895	62.0584	37.1855	64.1053	60.1146		11.282	13.5551	13.5476	15.4886	15.802	19.7939	17.2464	17.9867	28.8833	25.8102	28.0496	44.46	51.6563	48.6773	36.4865		16.5735	19.5396	17.9897	13.7797	20.636	18.1716	9.07561	17.9977	19.8761	122.614	180.999	172.705	107.416	81.1017	106.672
MSTRG.2635	Putative allergen Pru du 1.06A	16.3732	22.9803	16.6216	9.0557	10.137	2.59853	5.3398	5.79261	5.26023	31.6128	15.4956	37.413	17.3918	20.5965	40.0628		3.99263	4.25986	4.58263	4.87029	6.30564	3.64991	7.02283	6.08198	17.8742	13.579	9.72472	25.5991	12.3416	13.3344	15.0278		5.97238	6.22684	6.52149	3.95185	5.85508	4.33674	3.35926	15.4424	12.6843	64.2357	86.8553	115.377	50.5764	31.7579	58.2606
MSTRG.27092	WAT1-related protein / (MtN21like)	42.5404	39.1413	42.7985	20.6481	20.2282	13.5875	9.47507	8.24969	11.7909	56.7846	58.4473	53.6601	75.8793	67.1026	76.1922		35.4043	33.7955	34.684	16.6942	18.9945	18.5022	13.9525	14.206	16.7322	50.1566	44.1195	48.8391	59.6146	61.1991	60.6384		26.3293	24.3131	25.7684	30.6201	28.9297	33.3994	10.0863	13.063	10.9891	41.7222	55.1894	50.283	33.1913	35.4595	35.5813
MSTRG.27315	Geraniol 8-hydroxylase-like	11.6554	10.5292	11.0012	4.41922	4.07289	2.18123	9.34674	7.7222	9.45106	34.9327	39.4535	30.0678	22.2016	30.8724	31.5452		1.68173	1.74295	1.13432	1.49984	1.24905	1.22604	1.58701	1.25663	1.21406	12.6468	17.5169	14.5949	27.8315	26.7715	24.8265		0.372272	0.283223	0.502599	1.20264	1.50309	1.59648	2.75475	1.42642	1.35165	7.70493	10.4366	9.49409	5.38813	4.91836	4.37255
MSTRG.27326	Leucoanthocyanidin dioxygenase	312.59	288.841	280.587	172.743	161.97	110.95	464.27	300.441	374.007	2287.52	1859.38	2672.05	4952.22	4768.55	4148.85		208.534	214.171	187.962	175.565	162.405	171.985	310.384	285.742	301.011	1412.24	1309.32	1391.78	3155.77	2023.56	2436.05		22.3543	21.6312	23.7774	106.582	107.631	101.543	167.968	149.929	125.132	1830.12	2777.36	2461.39	2391.25	2548.07	2274.09
MSTRG.27490	Protein LURP-one-related 2	0.582474	0.716512	0.611496	0.437109	0.72592	0.204621	1.40019	1.4889	1.55774	29.2873	19.3851	24.3897	3.97443	5.17374	6.20605		1.14235	1.1026	1.30116	1.50009	0.980887	1.14079	0.737105	0.074074	1.14054	15.549	13.2126	11.2822	8.55983	5.74412	8.59493		5.69884	5.94389	4.87961	10.3993	7.73365	8.22484	16.477	13.3073	8.56713	59.156	53.4463	48.0976	43.3214	53.176	39.8934
MSTRG.28186	Probable inactive purple acid phosphatase 27	22.8878	21.0952	23.3153	16.194	15.4091	12.7268	17.3627	11.4254	15.9324	21.0464	18.0416	21.4532	112.962	108.416	108.908		18.1044	18.8279	18.6598	26.3782	24.1206	27.9378	23.4703	23.6691	23.5976	18.5249	21.7877	24.0519	109.052	77.6416	91.8789		21.5778	20.1425	21.4976	21.7016	22.1104	23.2286	14.9224	22.6331	16.4458	20.1187	20.4874	21.3572	30.112	30.9368	33.1985
MSTRG.28575	Uncharacterized protein	4.04842	7.21563	6.60293	1.21159	1.87383	1.46666	24.4246	27.2832	36.2997	83.9552	94.8403	113.285	246.931	217.594	253.744		4.06266	5.45698	9.20117	3.91203	8.53383	4.59554	13.6701	7.57633	13.1251	55.9197	104.482	190.145	136.491	97.0188	222.785		3.93072	2.59355	5.0599	4.53812	4.21365	7.79013	110.768	5.80013	11.1246	200.275	191.914	213.264	153.646	87.0207	183.191
MSTRG.28756	Flavonoid 3'-monooxygenase	21.9491	27.1195	26.9904	9.36841	9.55604	6.94799	12.8229	9.70441	9.67863	117.632	104.676	158.239	284.32	229.476	256.593		4.49514	3.7512	3.03038	2.77448	4.27033	3.30341	2.7011	4.52182	4.46142	52.5426	43.7414	38.399	180.521	98.2882	168.363		2.97787	3.54596	4.26098	3.4383	2.74137	4.52651	6.52107	6.55933	3.86027	149.613	183.879	205.01	114.959	102.859	115.625
MSTRG.28757	Flavonoid 3'-monooxygenase	169.648	190.037	173.656	66.6334	64.5087	44.7189	71.9252	29.1099	40.4434	564.718	557.68	796.54	1562.13	1348.63	1405.11		27.6156	23.4419	22.1767	27.3057	26.2894	25.1422	18.0111	23.7827	22.4703	242.221	195.679	185.827	707.387	458.668	621.922		30.3617	25.8101	27.2472	28.8658	26.3101	24.1866	27.114	35.3469	12.032	632.715	925.48	881.284	524.787	536.177	600.668
MSTRG.28943	Uncharacterized protein	69.5222	64.0381	62.1874	26.1572	22.4626	17.1533	33.6308	26.006	35.1856	69.3839	101.325	64.8974	149.209	157.615	145.473		42.0453	37.116	37.824	20.1764	18.7157	19.1627	30.8062	27.8256	23.5999	71.317	59.318	60.4631	150.892	147.928	145.483		69.131	64.8061	58.3	37.4477	34.6615	38.5211	40.2483	32.7995	43.0456	92.5516	122.4	113.197	116.147	106.953	96.3624
MSTRG.30291	Putative RING-H2 finger protein ATL53	1.95501	2.13573	2.10049	3.63303	3.84921	2.41618	11.4035	7.09322	8.50762	14.0761	7.25017	13.4302	19.5785	23.9896	16.9323		1.61349	1.94127	1.60799	3.4375	3.52656	3.51826	4.49673	3.56082	5.96608	2.36746	3.72178	4.31287	6.18426	5.47362	8.85539		1.5734	1.28552	1.45329	5.08449	6.29136	4.73185	6.17683	12.3273	10.3319	14.3282	9.58162	11.914	13.327	25.714	23.744
MSTRG.30602	Receptor-like serine/threonine-protein kinase NCRK	9.81254	9.68226	10.3869	6.78436	6.43435	5.97853	5.47814	6.64604	5.33994	11.0839	8.61455	14.1918	29.5836	26.7547	25.1947		5.95651	6.1035	6.78804	5.68502	6.46066	4.79128	4.80559	4.96198	6.06027	4.33032	4.35018	5.52067	8.87666	7.9866	9.55613		11.4496	10.8185	10.9401	9.34291	10.0361	10.9772	3.23586	6.26377	6.31244	8.70527	12.6813	11.0597	7.69739	5.56346	9.10734
MSTRG.31272	Pathogenesis-related protein PR-4	6.69748	7.40174	6.73881	11.2031	13.2793	5.59286	34.9331	32.1249	32.9787	66.041	58.8343	67.7739	47.3152	69.0512	85.5547		4.89281	3.99952	5.99179	2.35218	2.32557	2.59043	13.9436	16.3626	18.1523	20.8614	20.0849	30.7537	90.7771	97.9908	64.6235		3.17179	3.27209	2.07668	12.1857	9.63463	10.9598	23.7769	68.932	51.6486	240.608	458.07	384.687	519.549	366.843	404.146
MSTRG.31433	Pathogenesis-related protein PR-4B	2.95625	3.68769	3.09551	2.17032	2.91878	0.926768	10.7948	7.0422	8.46897	27.0236	18.6627	37.6709	17.4043	26.364	31.9386		3.01614	2.59733	3.05413	2.27411	1.83976	2.35828	9.54932	11.2717	14.8765	26.5299	26.6495	39.1056	155.02	144.195	106.261		1.02466	1.25028	0.566282	2.29844	1.7364	2.41511	5.60325	17.8516	17.8568	164.995	335.617	277.477	341.841	254.444	262.975
MSTRG.32152	Bifunctional aspartate aminotransferase and glutamate/aspartate-prephenate aminotransferase	81.8238	86.4695	92.2611	24.8544	23.6531	19.5672	40.8282	27.1442	38.8973	78.4909	93.8315	95.4633	97.0909	106.142	98.5095		24.5233	49.6557	44.7793	36.254	31.9597	32.3614	22.3717	25.2636	27.0379	43.4985	57.1508	66.9634	74.2995	56.7954	75.2292		42.7982	54.7199	54.5343	45.4097	46.1949	45.2291	36.8675	36.1901	35.15	42.1086	53.9132	54.0242	34.7305	32.4832	35.5875
MSTRG.32251	Phospho-2-dehydro-3-deoxyheptonate aldolase 1	153.158	125.092	132.401	45.3034	42.4713	33.7227	98.2187	48.6469	70.8666	265.016	252.342	295.541	303.459	311.087	408.154		68.8115	56.2172	59.0276	26.0679	33.9936	33.0373	21.7421	21.9513	26.73	242.033	209.888	303.866	292.95	201.916	370.569		68.2466	60.6478	73.5088	100.359	81.7039	78.84	92.5269	79.1572	64.4711	350.911	379.406	408.391	369.275	328.789	323.904
MSTRG.32457	Serine/threonine-protein kinase SAPK2	28.3303	28.8209	32.742	16.945	14.4144	10.2049	35.4757	25.146	44.0674	80.1933	117.169	44.1104	102.327	133.416	128.685		19.8015	23.76	22.2781	10.977	12.3773	16.6193	13.1087	22.1256	17.2349	60.0505	78.359	43.2033	90.1361	57.0139	90.7674		17.951	27.6262	20.3394	23.1045	22.121	39.192	51.933	11.4726	28.1062	53.3905	67.5514	72.0358	67.9762	51.5107	47.2694
MSTRG.32669	Phosphoenolpyruvate carboxykinase (ATP) 1	630.048	606.733	615.691	371.586	371.464	305.389	502.315	414.062	551.345	943.79	605.709	1143.74	2504.31	2277.6	2593.07		295.345	296.085	280.764	1550.75	1433.61	1619.81	847.247	837.49	576.622	856.465	996.013	556.941	2108.35	1760.39	1629.22		209.693	216.587	223.627	482.384	413.9	458.123	243.105	303.51	228.543	1209.57	1141.22	1367.04	3197.24	3163.35	2690.6
MSTRG.32779	VQ motif-containing protein 29	1.81974	1.56824	1.28855	1.27765	2.15372	1.39024	8.0597	7.17098	7.80046	18.0044	17.5052	16.2238	37.1468	29.9377	36.8812		0.475813	0.552391	0.34388	0.750779	0.605455	0.858317	1.52548	1.91049	0.640167	8.77889	15.6748	8.42235	34.9171	36.2143	40.4626		0.986964	0.858262	0.58112	2.74862	3.15957	3.01499	9.9689	1.06654	2.14609	60.8786	64.4751	63.4782	53.4342	54.1728	51.8794
MSTRG.33061	Ethylene-insensitive protein 2	103.552	96.9938	110.491	37.3718	33.3175	29.9524	42.4528	22.5243	35.6207	239.443	186.187	300.482	438.524	433.748	348.022		46.7929	40.9199	42.5251	39.5427	35.9946	41.8378	37.383	39.1035	39.9575	112.428	90.0924	82.0937	330.423	219.682	268.067		60.6481	54.9871	66.5523	57.3245	48.785	55.4961	36.5618	42.9529	26.1947	287.933	461.343	422.375	234.534	273.97	281.791
MSTRG.34894	2-alkenal reductase (NADP(+)-dependent)	7.49933	7.76185	9.10175	4.37157	4.43444	3.29575	3.21768	4.64131	3.24473	9.24206	5.44899	6.86094	15.0722	23.095	18.3975		3.95732	4.2191	4.52457	6.13884	4.53709	4.79031	4.05112	6.75989	4.43364	5.62332	6.12724	5.406	10.7727	6.22015	8.12127		7.02414	5.52802	4.65767	4.96165	6.15651	6.18306	3.73123	3.521	6.75499	4.1029	8.28715	6.29664	9.04976	6.20566	5.06831
MSTRG.34925	Ubiquitin-conjugating enzyme E2 22	80.0113	47.2899	53.3688	32.068	61.4914	43.6304	39.3545	30.9954	38.9166	100.842	85.0825	96.3735	194.177	156.075	161.256		74.1171	55.6463	31.3449	33.7493	37.1022	35.9914	27.7574	31.588	37.3884	67.9726	66.7041	62.3403	90.7114	61.8117	57.5541		31.889	34.2181	47.5502	38.2172	41.0477	39.8673	34.9566	35.8939	33.6042	64.1792	106.522	84.1789	75.9524	81.6757	40.7577
MSTRG.35816	Two-component response regulator ARR8	8.08999	8.67362	9.19538	1.85108	1.81631	2.01582	19.6686	24.9044	32.0245	53.7756	48.0151	45.5629	33.348	21.7605	35.1118		10.7063	10.8005	14.2278	12.9935	12.3962	11.7367	40.1365	28.1903	33.824	46.8386	59.4884	56.3039	20.3251	14.4325	15.6779		8.93897	9.45291	8.78537	4.25044	3.53678	4.20386	95.5866	26.7965	34.841	101.665	81.3685	85.443	87.0981	61.399	82.0747
MSTRG.36131	Folylpolyglutamate synthase	8.54028	6.60627	6.68218	7.04233	5.09988	5.98768	360.94	235.411	248.843	2846.42	2574.62	4128.06	6976.44	9440.41	7107.91		4.95423	3.96475	4.6704	16.8531	11.4756	13.0259	280.288	202.211	147.132	1646.05	3512.89	3121.17	9719.68	4361.23	6027.07		5.60332	4.84859	6.02603	8.60694	10.0761	8.74046	705.223	130.71	78.0343	4486.84	3348.15	4137.34	8955.26	6978.03	10538.3
MSTRG.36157	Glucan endo-1,3-beta-glucosidase	0.984096	2.24079	1.91523	6.00715	5.35094	2.80934	226.058	83.5782	141.938	1447.41	1530.3	1238.39	4533.37	2910.47	2914.48		1.02751	0.809566	0.749034	11.7619	10.4503	12.1776	223.117	39.8944	35.0151	769.327	1091.03	763.125	5919.46	3078.08	1736.34		0.06363	0.62583	0.767402	9.14736	11.3977	11.8255	629.757	66.2554	78.6647	1526.78	1919.77	2098.36	5489.62	3141.48	5647.09
MSTRG.36575	Retrovirus-related Pol polyprotein from transposon RE1	2.64491	2.29682	2.6266	1.98752	3.88872	2.932	6.18971	6.37883	4.67648	113.505	25.6218	195.18	56.8485	90.9009	124.053		4.55532	1.84102	4.90837	2.37998	3.41103	1.78124	7.72581	7.49894	7.59698	5.14885	14.7699	8.4752	40.2691	51.3113	35.3362		2.52838	2.03806	1.7811	2.39529	1.85854	2.90075	9.11101	12.3907	7.94891	83.8224	50.8349	91.7127	271.75	154.912	173.775
MSTRG.36576	Polygalacturonase inhibitor	33.0243	48.8421	35.1505	31.7929	32.6071	20.0259	225.799	131.046	135.772	802.879	803.796	1212.68	1245.01	1372.53	2634.32		2.14624	3.31141	2.91271	14.3106	11.5063	8.10522	48.8065	54.2881	49.5334	153.345	190.781	155.631	697.586	725.599	605.069		24.9182	15.9962	18.5085	19.155	26.5183	22.264	170.393	193.444	89.9565	927.599	1100.21	797.031	1883.86	2236.07	2434.58
MSTRG.37039	Cyanogenic beta-glucosidase	128.638	150.626	130.011	63.0295	87.6251	31.5381	253.85	151.542	231.678	499.415	406.533	485.612	174.04	126.343	264.642		98.0387	83.416	92.9204	199.275	208.602	187.924	207.696	178.719	179.024	200.585	171.941	180.538	182.886	123.759	136.098		67.9564	78.0076	63.0691	142.772	147.911	157.539	512.085	495.154	305.377	831.217	719.82	677.529	652.378	614.067	807.074
MSTRG.37287	Nicotinate N-methyltransferase 1	0.970702	1.02688	1.17704	0.899644	1.15622	1.62473	10.6231	9.70105	15.1912	34.7556	23.5552	28.6265	19.0756	14.8643	20.9482		4.20122	4.2865	1.83093	0.285675	0.249716	0.260539	1.20607	0.629158	0.80862	17.5073	27.229	12.1311	19.9129	18.2052	18.6649		5.91504	6.99587	5.11187	2.20368	6.23168	2.10445	15.3987	3.1324	2.72405	30.0068	23.6593	25.1965	44.3163	42.215	40.3468
MSTRG.37364	Uncharacterized protein	2.52688	2.29267	2.59798	1.2477	0.505039	0.54708	1.8348	1.16603	0.848097	10.7208	8.24524	10.5346	6.31606	8.74214	4.4231		1.69433	2.5241	2.2284	1.46018	2.11749	1.63533	0.84959	1.85072	1.9893	0.182735	0.20949	0.055519	0.095817	0.55122	0.262707		2.65189	3.57229	3.65181	1.77605	0.977364	1.55971	1.86383	2.19102	1.58216	8.88023	12.4103	11.12	10.2501	9.51511	9.43356
MSTRG.37855	Thioredoxin reductase 2	90.2734	101.552	88.1313	55.8216	65.9937	41.0242	127.461	90.1214	100.875	153.661	151.092	158.618	179.532	184.092	163.93		69.0669	64.1573	65.5513	90.5754	68.9066	76.8735	90.7542	88.3338	95.6074	77.8373	95.203	105.53	137.464	127.875	127.663		78.9786	82.9311	74.5188	89.2663	94.121	77.9877	100.594	105.758	84.9071	105.151	130.151	123.84	86.5245	95.023	76.4438
MSTRG.37857	Uncharacterized protein	1.30542	1.49151	1.82327	1.39138	1.88041	0.93681	2.13896	1.39437	2.89385	13.2299	9.92401	8.84595	13.9445	17.1177	10.162		0.789562	1.55694	0.669119	2.37881	2.75437	2.71911	7.12669	5.93693	7.70798	3.90451	5.36121	8.00108	5.78979	6.67127	7.50059		0.510297	1.11854	0.65531	1.03767	1.73192	1.19012	4.41134	6.96759	3.65558	3.12493	9.19019	7.65056	4.6231	5.13329	3.08719
MSTRG.38612	Umecyanin	10.149	17.414	12.4283	7.01477	5.4182	3.04093	46.8991	40.4495	49.8197	238.475	178.391	265.293	217.876	209.171	243.984		4.85908	3.49998	3.46911	2.88216	4.02136	2.81886	7.36336	8.51116	8.41766	34.736	50.1943	69.2646	119.464	102.788	105.935		2.78607	1.92852	3.26042	11.6493	10.7756	13.6081	83.6425	40.2994	33.6507	234.13	303.781	259.178	281.061	263.222	256.903
MSTRG.40755	Oligopeptide transporter 4	3.91336	4.27232	4.49491	1.86948	1.60223	1.24081	1.73724	0.902855	1.48052	8.52616	5.54406	7.07603	12.7735	8.68629	12.0334		1.66352	1.44456	1.34277	1.87341	2.02582	1.72152	1.42037	1.09728	1.10212	3.58792	4.39621	3.99063	6.58967	4.48586	5.18638		4.27302	5.07395	4.68203	2.89392	2.65372	2.45076	0.816654	1.51022	0.825624	2.77832	2.50306	2.21871	3.59167	6.65733	5.3577
MSTRG.42352	Transcription factor IBH1	2.85817	3.90301	2.81635	1.20005	1.21067	0.266806	6.23963	3.93549	5.73884	49.3436	26.9776	38.8771	62.2289	85.6763	74.9232		4.32538	3.92461	2.55543	2.37936	2.4925	3.26137	7.33119	6.65148	7.82825	37.2048	47.9301	61.341	14.73	46.5097	60.6258		2.77215	2.12751	2.85075	2.11882	1.58622	2.22675	15.7704	5.94286	5.75802	11.1356	14.2256	12.8642	18.0548	14.2427	17.3457
MSTRG.42503	Cytochrome b5	89.0204	93.3158	87.5594	34.5921	35.3491	24.4445	62.1283	46.875	57.2805	111.094	111.803	101.049	154.199	163.863	152.555		67.741	73.3598	76.6903	63.6765	76.5504	70.1967	52.813	55.5315	51.7891	67.2879	77.1689	78.9567	105.015	69.8099	94.4759		65.1856	69.3459	69.4564	61.4397	69.9003	70.7016	52.6865	48.9709	67.7464	74.4088	97.9323	79.5956	72.4601	75.0738	70.8198
MSTRG.42884	Phospholipid-sterol O-acyltransferase	4.74453	4.41523	4.59597	2.13042	2.2833	2.12723	4.83415	2.52133	5.35899	6.32817	7.7162	6.85137	11.9884	9.80856	10.3667		4.18209	4.63763	5.07532	3.65294	3.43366	4.23363	4.94561	4.59088	4.48864	5.26798	5.90768	7.41577	7.68286	7.45207	6.34852		3.32681	3.22264	4.07051	3.70142	3.82439	3.5189	5.88174	5.06107	4.44356	10.8877	9.55653	7.74899	6.46828	6.51916	7.06909
MSTRG.4525	Histone-lysine N-methyltransferase ATX2	4.83711	3.65905	4.83843	3.61398	3.2368	3.04639	4.72498	4.49221	5.22559	50.993	38.922	178.954	105.677	81.2088	214.315		6.11613	6.24443	6.36007	3.4503	3.33442	2.88261	4.86429	4.55379	3.342	46.2525	46.5388	36.4326	219.414	60.0601	142.783		3.77247	3.66992	3.61228	3.1709	3.48849	3.78055	2.88288	2.57255	1.89086	77.6643	82.7186	158.382	62.4501	117.108	105.78
MSTRG.6095	Glutathione S-transferase U17	115.91	107.621	106.603	88.971	89.2731	24.2442	162.981	92.0478	135.665	815.024	1020.23	829.432	996.207	1159.44	466.93		40.8177	40.447	39.9496	60.0552	54.0605	58.8108	107.099	90.1207	105.312	287.481	453.114	621.845	784.515	299.794	448.032		100.075	100.723	85.1318	90.4449	83.9982	86.3022	948.486	197.831	346.294	987.366	1200.68	1214.04	849.388	803.744	350.247
MSTRG.6844	Transcription repressor MYB4	4.67291	4.18519	4.51993	2.44447	2.14259	1.75771	3.89381	1.75017	2.85999	17.4539	16.4966	20.4436	20.3336	15.2521	18.7244		6.86179	7.85498	7.54506	6.31638	8.54432	8.89212	9.29527	9.4335	10.1728	16.8179	10.7256	7.28078	11.8826	9.39532	8.87616		5.22479	4.75589	4.80374	5.77248	5.08913	5.39875	5.28828	6.85494	4.88098	21.4701	28.346	24.1023	18.0066	27.9103	24.5912
MSTRG.7421	Dihydroflavonol 4-reductase	64.1525	67.0511	60.9655	20.1252	19.5668	11.4723	117.691	51.3779	77.0191	357.912	233.309	511.639	1739.86	1665.17	1489.77		19.966	21.5402	22.9035	43.9177	37.0274	39.6092	45.3625	44.687	36.6123	184.588	165.49	147.759	625.602	419.182	499.314		38.4507	34.9901	39.2055	28.2428	29.3692	25.2315	58.1907	49.4116	31.7805	322.672	549.291	472.76	531.056	523.912	502.383
MSTRG.7464	Probable E3 ubiquitin-protein ligase ARI2	90.3518	91.7279	94.9283	54.4733	49.2552	35.179	33.1662	28.9315	39.1307	131.69	188.764	188.375	284.456	274.439	268.672		53.8903	51.6553	50.5575	51.0785	54.6414	59.4212	46.4077	47.9093	54.1316	116.785	133.529	151.14	267.399	178.222	251.847		58.5702	50.9747	59.3136	88.3848	86.3447	93.6009	20.0994	25.9929	29.3122	230.397	317.286	258.729	175.09	216.004	190.887
MSTRG.7465	Protein DETOXIFICATION 33	22.1519	26.511	18.7103	10.2544	7.63246	5.26037	8.33071	10.1855	12.3495	30.4743	32.9255	41.7668	109.481	56.7365	58.821		7.83981	9.20365	7.12795	8.60905	8.54484	10.1064	9.45734	8.32032	7.73931	19.5832	20.6825	25.9201	45.1056	32.3015	46.8078		5.37227	5.43891	3.64758	7.4285	5.98461	6.41713	1.327	2.03028	3.57595	18.3204	26.769	20.8548	11.9905	18.9126	14.8085
MSTRG.7715	Glutamate receptor 2.8	3.37117	3.20094	3.73637	1.83353	1.79651	1.15345	3.86127	2.92378	5.05513	21.9482	13.5945	22.1049	14.2429	11.7894	9.11786		1.76656	1.61058	1.83991	2.23153	1.83212	2.67074	2.22576	1.8997	2.15964	0.894961	0.873481	1.1007	1.51903	0.713251	1.04919		2.48965	2.59448	2.83545	4.44971	4.4276	5.05801	63.0613	24.0328	25.5549	53.8653	44.195	43.7896	26.5134	26.632	25.6637
MSTRG.8053	Cytochrome P450 81Q32	9.14239	8.90194	9.09373	5.38904	5.22602	3.39121	5.80922	4.56197	6.76401	16.0703	15.7416	14.3166	18.2601	14.6108	15.4628		6.4999	6.60763	6.63072	5.68866	5.65017	5.61019	5.82374	6.20591	6.77177	10.6035	11.271	13.7299	10.6363	8.78717	10.5172		4.89589	5.29074	4.58448	8.12282	7.85427	8.24628	4.01536	5.11196	4.28806	9.87975	11.9657	9.78565	6.9092	8.59856	7.71769
MSTRG.8715	phosphopantothenoylcysteine decarboxylase subunit VHS3 isoform X2	6.20132	7.82513	6.74768	2.96625	3.48545	2.1999	2.01447	2.08687	2.67544	9.07047	11.961	10.8078	12.5319	11.9486	12.2266		5.79949	5.05706	6.39223	3.9446	3.98199	3.3705	3.74453	4.15256	4.26198	6.07506	4.78333	5.83919	5.106	4.6407	4.95089		6.23531	7.72828	6.33575	5.16498	5.57441	5.25798	2.83417	3.45459	3.14872	6.22345	8.75956	7.43523	4.83694	4.76857	6.14464
MSTRG.885	Protein DJ-1 homolog D	81.0922	79.7492	96.9488	28.7091	24.3097	19.4206	86.1049	105.429	131.422	164.581	263.278	134.252	621.394	505.095	353.404		26.0549	23.3015	27.6407	72.4145	67.7	96.6124	139.727	152.674	116.437	238.437	181.326	233.846	544.261	940.245	442.378		73.7906	71.5856	77.6478	38.0828	42.1694	39.1647	191.654	84.9181	104.86	567.075	778.631	841.826	1170.9	1043.86	935.077
MSTRG.886	Protein DJ-1 homolog D	117.71	154.371	106.725	46.0045	38.3241	27.5853	145.4	149.989	311.944	139.309	483.294	289.436	747.401	700.55	976.557		7.98427	29.6126	15.015	93.478	41.6938	86.141	259	210.324	234.551	305.983	289.584	445.255	687.45	1377.42	814.115		109.292	93.7493	119.599	58.5467	58.1376	57.9823	296.852	142.055	210.817	850.997	1270.24	461.301	691.333	1230.69	1849.72
MSTRG.9062	Tubby-like F-box protein 8	11.9004	10.8596	12.1806	6.37739	6.64189	5.68872	7.55878	2.97794	5.69518	27.2564	29.2813	38.293	36.0979	32.366	27.0494		8.31287	6.93616	7.49654	6.94758	6.77847	8.26024	5.44803	6.1087	5.91623	22.5675	20.126	19.4785	33.6543	21.3149	22.3922		6.87284	5.49919	7.46979	7.84556	7.32506	8.26433	6.02876	5.97656	3.40853	25.9246	28.0294	26.2157	10.6718	14.5433	16.6072
MSTRG.9593	COS1_COCNU Cocosin 1	34.1397	44.1411	38.4576	32.9632	29.5127	22.5581	60.4139	136.732	92.1041	374.846	303.246	345.66	247.542	762.038	336.787		63.2587	66.2916	40.3158	57.0218	48.8927	43.3653	97.1511	71.8319	53.2948	197.013	199.138	296.51	275.143	337.546	293.255		35.22	42.2984	39.9297	29.0102	33.8558	25.5129	112.053	57.426	61.346	336.846	849.434	825.976	396.46	579.013	280.177
[truncated: 15 more columns]

## Sheet: Table S3
Supplementary Table S3. The expression levels of anthocyanin pathway genes in dark-red and yellow fruits during fruit development
Structural genes/ Transcription factors	Description	Gene_id	HP31																HF																HP5
			S1-1	S1-2	S1-3	S2-1	S2-2	S2-3	S3-1	S3-2	S3-3	S4-1	S4-2	S4-3	S5-1	S5-2	S5-3		S1-1	S1-2	S1-3	S2-1	S2-2	S2-3	S3-1	S3-2	S3-3	S4-1	S4-2	S4-3	S5-1	S5-2	S5-3		S1-1	S1-2	S1-3	S2-1	S2-2	S2-3	S3-1	S3-2	S3-3	S4-1	S4-2	S4-3	S5-1	S5-2	S5-3
PAL1	Phenylalanine ammonia-lyase	MSTRG.14474	100.402	91.9744	108.21	13.3598	13.4953	17.6049	6.71278	2.81144	9.48377	166.461	164.548	125.845	118.347	133.659	103.198		35.0453	31.1986	33.7097	12.1078	11.1573	12.5197	18.8165	13.6668	4.6904	76.4777	130.032	108.636	161.154	129.158	160.533		38.4799	46.5174	52.9418	80.0104	67.7596	79.3717	6.42975	7.47292	5.22246	6.80663	15.1691	12.5039	7.42407	8.08374	7.23623
C4H	Cinnamate-4-hydroxylase	MSTRG.2502	13.8238	13.035	14.2317	3.17198	2.41392	4.37113	0.25376	0.092654	0.531419	0	0.025331	0.026981	0.025743	0	0		8.77331	8.8059	10.3723	0.076795	0.068782	0.118191	3.76679	2.88195	0.233769	0.411913	0.624615	0.126935	0.160651	1.3011	0.305076		4.07507	5.15568	6.8804	17.1414	14.3523	16.2064	0.052745	0	0	0.013073	0.077796	0.026133	0.025973	0	0.078586
4CLL7	4-coumaroyl:CoA-ligase	MSTRG.30698	14.1599	15.3269	16.656	6.18636	6.48074	4.64798	13.2039	7.75223	12.0876	29.2872	24.9762	27.3444	28.1609	25.4715	27.0366		11.2618	10.4183	12.3605	11.6567	12.0708	12.2493	9.69329	10.8298	12.2649	38.6197	30.6465	26.1457	23.9466	38.774	20.7724		13.2686	12.1572	13.1342	16.3302	16.6315	16.8229	15.9669	17.5181	9.72946	23.011	21.0353	19.786	12.1851	11.1543	15.7639
4CLL9	4-coumaroyl:CoA-ligase	MSTRG.28212	172.712	178.081	191.869	101.763	98.0857	84.4755	140.574	151.787	148.395	224.78	194.829	204.518	200.358	189.999	214.075		131.665	126.006	134.417	151.551	161.613	149.75	116.624	122.492	117.605	255.23	244.489	235.249	258.58	216.448	423.121		162.914	157.786	166.326	236.891	206.439	216.261	176.514	150.161	174.111	282.865	273.193	280.54	272.113	274.22	480.488
CHS2	Chalcone synthase	MSTRG.1698	30.3689	31.0017	31.5519	7.17173	4.84612	3.57948	8.0915	2.52372	3.70344	85.8866	35.0676	67.0035	286.701	329.579	285.052		6.91309	4.77829	4.29936	2.45591	2.30209	2.23521	0.625657	1.10183	1.03249	63.6368	65.2409	31.7717	96.9143	114.416	160.202		4.11864	2.67711	2.98121	5.80662	3.86237	5.09535	5.43881	8.35583	1.4456	69.8576	111.578	119.402	101.052	102.245	93.26
CHS1	Chalcone synthase	MSTRG.1697	25.3775	17.1109	27.7228	5.6777	4.06234	3.35744	13.0312	2.83506	7.00823	115.227	74.0804	201.293	1056.48	798.919	754.181		10.0493	5.37348	6.00703	1.58522	1.23068	1.51517	0.789206	1.23656	0.549769	99.5153	79.4977	66.6738	444.639	285.788	356.082		1.00882	2.45211	1.04713	3.56504	1.84882	3.52152	10.8699	13.9141	1.0956	248.109	485.363	570.643	343.473	295.376	282.841
CHI3	Chalcone isomerase	MSTRG.15194	106.199	99.6054	95.8128	35.5603	36.7065	20.2355	88.6128	49.8233	64.9802	779.095	606.966	899.09	2127.37	2148.46	2039.12		27.1394	27.7094	28.9619	31.6798	35.8266	33.964	31.91	34.1063	39.5503	377.136	333.822	341.729	1271.62	776.838	1059.21		21.8496	27.5218	24.8312	44.2604	43.9645	48.3185	63.6773	78.55	50.8391	863.698	1491.64	1187.78	1021.33	1065.7	1028.74
CHI	Chalcone isomerase	MSTRG.14693	23.9143	17.6491	10.7826	8.68298	6.25441	6.67311	34.3852	11.2468	14.2464	107.587	62.5136	74.6622	294.392	323.104	388.014		6.53902	7.25181	5.94186	5.85801	5.04785	5.22706	5.78535	6.11952	6.52346	25.1931	99.3394	17.586	155.617	269.783	252.917		12.6108	9.75965	6.88153	8.6274	23.7369	11.3437	13.2057	16.9583	19.2572	76.6767	143.888	104.837	114.26	133.134	125.887
F3H	Flacanone-3-hydroxylase	MSTRG.37781	160.292	151.462	151.344	62.8348	59.827	44.0555	81.4328	36.0352	41.1584	240.317	147.851	346.672	840.836	805.253	678.723		69.8259	56.789	53.236	104.349	91.2504	105.215	55.1365	53.9471	67.6313	72.663	71.845	66.1751	228.662	150.419	183.23		49.2912	54.8016	50.6692	79.0035	77.3132	71.9973	46.624	103.998	54.4539	156.018	280.367	275.499	210.761	217.007	216.305
F3'H	Flacanone-3'-hydroxylase	MSTRG.28757	169.648	190.037	173.656	66.6334	64.5087	44.7189	71.9252	29.1099	40.4434	564.718	557.68	796.54	1562.13	1348.63	1405.11		27.6156	23.4419	22.1767	27.3057	26.2894	25.1422	18.0111	23.7827	22.4703	242.221	195.679	185.827	707.387	458.668	621.922		30.3617	25.8101	27.2472	28.8658	26.3101	24.1866	27.114	35.3469	12.032	632.715	925.48	881.284	524.787	536.177	600.668
F3'5'H	Flavonol 3′ 5′ -hydroxylase	MSTRG.16880	0.704947	0.644079	0.679248	0.542383	0.796834	0.773657	0.598782	0.559132	0.357035	0.127928	0.156871	0.055518	0.66776	0.400757	0.538861		0.925612	0.467435	0.467475	0.204077	0.161457	0.114676	0.07786	0.074892	0	0.088053	0	0	0	0.438432	0.05675		0.073821	0.162307	0	0.154379	0.263989	0.285583	0.069209	0.224303	0.064506	0	0	0.017015	0.077457	0	0.073431
FLS	Flavonol synthase	MSTRG.8937	139.326	134.406	132.128	12.8446	12.9036	12.9294	3.45807	1.00423	1.6079	0.671936	1.58963	2.66526	36.8731	47.1496	5.83369		33.3018	39.7899	37.455	2.26093	2.50349	2.79365	2.14014	1.49562	3.12833	0.557463	1.09128	0.458693	0.38488	9.22233	0.58547		27.4323	35.7031	35.1174	31.0802	26.806	28.9977	13.3218	32.8795	11.3485	0.907543	2.27984	3.02571	0.949873	9.66641	0.775598
FLS	Flavonol synthase	MSTRG.8932	230.573	220.496	205.842	91.202	92.098	57.276	50.6913	40.1955	54.6367	56.6273	56.3243	64.7989	434.31	405.208	309.188		76.3585	67.2124	68.7826	145.114	143.575	149.32	39.0673	40.8267	40.1906	22.11	30.7534	35.6743	61.4687	46.5237	68.9432		43.2796	48.3607	43.2262	58.7424	63.0206	57.605	12.3079	21.6517	24.3566	18.7387	33.8055	26.5039	19.3885	15.8598	11.2635
DFR	Dihydroflavonol-4-reductase	MSTRG.7421	64.1525	67.0511	60.9655	20.1252	19.5668	11.4723	117.691	51.3779	77.0191	357.912	233.309	511.639	1739.86	1665.17	1489.77		19.966	21.5402	22.9035	43.9177	37.0274	39.6092	45.3625	44.687	36.6123	184.588	165.49	147.759	625.602	419.182	499.314		38.4507	34.9901	39.2055	28.2428	29.3692	25.2315	58.1907	49.4116	31.7805	322.672	549.291	472.76	531.056	523.912	502.383
LAR	Leucoanthocyanidin reductase	MSTRG.6641	3.61819	4.35628	4.08779	1.12875	1.63021	0.97927	0.05433	0.231307	0.147976	0.090138	0.086033	0.181746	0.218873	0.229391	0.106938		6.63322	6.2957	5.14578	0.784027	1.04716	0.826102	0.650844	0.555265	0.471703	1.25274	0.492497	0.345568	0.598329	3.18583	0.713421		5.70177	5.03801	4.64366	2.99106	2.68395	2.83543	0.117999	0.0885	0.163622	0.296168	0.13285	0.207562	0.426344	0.582339	0.237682
ANR	Anthocyanidin reductase	MSTRG.20846	8.30979	8.62235	8.82818	3.57817	3.93639	2.63913	1.02485	1.36305	1.1181	0.859439	1.43819	1.43921	3.08196	1.96939	1.9831		7.71273	7.15694	6.8404	5.25505	4.83585	4.94843	1.68178	2.43901	0.989105	2.32939	1.24888	1.52557	2.29468	7.3426	2.53725		6.25967	6.35718	7.08671	5.63193	5.99785	6.59758	0.981869	0.375752	0.886836	2.22728	1.99446	1.81522	2.21754	1.9892	1.77173
ANS	Anthocyanin synthase	MSTRG.27326	312.59	288.841	280.587	172.743	161.97	110.95	464.27	300.441	374.007	2287.52	1859.38	2672.05	4952.22	4768.55	4148.85		208.534	214.171	187.962	175.565	162.405	171.985	310.384	285.742	301.011	1412.24	1309.32	1391.78	3155.77	2023.56	2436.05		22.3543	21.6312	23.7774	106.582	107.631	101.543	167.968	149.929	125.132	1830.12	2777.36	2461.39	2391.25	2548.07	2274.09
UFGT	UDPglucose:flavonoid-3-O-glucosyltransferase	MSTRG.15900	2.62705	3.14714	3.29929	0.967088	0.992618	0.700611	92.3139	49.0287	65.8348	616.494	624.925	868.685	1889.49	1574.46	1889.43		0.413677	0.433536	0.31447	4.26973	3.56911	3.64449	10.0284	25.1102	17.6001	335.654	309.555	326.48	1146.03	713.274	911.915		0.16415	0.336367	0.283503	0.452448	0.445722	0.32379	47.1454	42.4921	11.0432	785.761	1111.58	1003.13	957.702	1092.11	1153.01
GSTF12	Glutathione S-transferase	MSTRG.16122	0.48759	0.472722	0.766056	0.474983	0.804447	0.491158	166.004	79.8163	119.425	528.19	270.299	864.44	2895.01	2949.22	2818.13		0.093448	0.355201	0.284871	0.647125	0.349657	0.331363	4.95975	15.6703	11.2881	212.984	229.234	206.57	1355.69	903.47	910.709		0	0.1594	0	0.535002	0.171765	0.260103	94.898	68.2116	14.9102	475.241	644.827	834.784	1417.48	1527.7	1638.76
GSTU17	Glutathione S-transferase	MSTRG.6095	115.91	107.621	106.603	88.971	89.2731	24.2442	162.981	92.0478	135.665	815.024	1020.23	829.432	996.207	1159.44	466.93		40.8177	40.447	39.9496	60.0552	54.0605	58.8108	107.099	90.1207	105.312	287.481	453.114	621.845	784.515	299.794	448.032		100.075	100.723	85.1318	90.4449	83.9982	86.3022	948.486	197.831	346.294	987.366	1200.68	1214.04	849.388	803.744	350.247
GSTU17	Glutathione S-transferase	MSTRG.6097	37.3946	37.3462	32.0189	15.6422	15.6948	6.81228	9.92888	6.13357	8.95459	33.8153	30.9181	35.5411	105.852	113.455	98.6738		18.4353	17.3072	20.1777	33.3496	31.222	31.1227	17.3909	20.4336	23.4016	13.0461	15.6563	17.742	27.5857	24.6412	34.1186		15.398	14.6942	14.9969	20.2533	20.7311	15.0092	9.59119	12.8828	12.3773	31.8016	56.3604	49.0773	42.1464	38.2076	37.7616
GSTF9	Glutathione S-transferase	MSTRG.18923	262.627	245.348	223.548	286.61	344.078	214.149	62.7848	84.3037	125.072	65.7552	63.4829	51.4389	96.9343	148.636	176.893		797.805	955.694	996.644	350.738	371.347	363.699	163.835	238.405	179.016	129.291	170.626	147.216	386.319	876.734	500.908		472.553	616.368	516.235	193.484	217.006	207.43	44.8847	45.3102	75.2497	121.597	131.398	142.132	306.612	205.898	173.868
MYB4	Transcription factor MYB4	MSTRG.6844	4.67291	4.18519	4.51993	2.44447	2.14259	1.75771	3.89381	1.75017	2.85999	17.4539	16.4966	20.4436	20.3336	15.2521	18.7244		6.86179	7.85498	7.54506	6.31638	8.54432	8.89212	9.29527	9.4335	10.1728	16.8179	10.7256	7.28078	11.8826	9.39532	8.87616		5.22479	4.75589	4.80374	5.77248	5.08913	5.39875	5.28828	6.85494	4.88098	21.4701	28.346	24.1023	18.0066	27.9103	24.5912
MYB10	Transcription factor MYB10	MSTRG.18742	7.73517	7.81559	10.3455	5.65839	3.06386	2.41452	27.2668	21.455	18.2813	143.415	119.758	172.279	169.54	116.626	107.576		3.30363	3.3473	3.84279	12.3681	5.22661	7.56789	12.8246	15.8983	14.0946	115.27	90.5911	88.4328	142.933	123.653	118.883		14.8855	6.12106	4.90657	8.43074	5.64802	3.97838	31.3834	40.2902	24.4786	201.768	222.188	204.1	234.127	250.348	232.151
MYB20	Transcription factor MYB20	MSTRG.16184	9.72619	9.04018	9.17563	3.57821	2.76868	1.99304	1.1844	0.905958	1.91985	39.6607	34.7838	27.6817	26.2015	30.8217	17.5932		4.26527	3.52804	6.30273	2.4297	2.23727	2.94948	3.12177	2.45619	2.35224	26.3541	38.4379	37.171	37.1706	30.4742	40.2759		4.20345	4.51809	4.3404	11.7879	8.53478	11.7529	2.06714	1.33103	1.68822	0.478852	0.391957	0.388419	0.736102	1.12947	0.958096
MYB306	Myb-related protein 306	MSTRG.28655	10.8486	12.1475	12.2355	7.90064	9.83394	6.48978	12.4036	9.75499	9.76866	27.7021	15.5653	29.8142	35.921	35.856	32.6226		7.15174	7.63005	7.11177	13.0394	13.9605	11.9093	12.0437	10.5907	16.6235	23.6372	30.3867	25.4666	41.8318	65.1356	30.3264		5.41041	6.10588	6.73177	5.13748	6.75233	5.11625	10.408	21.3976	10.0219	10.7206	12.5902	10.2418	16.0838	21.8811	19.8362
MYB44	Transcription factor MYB44	MSTRG.8084	301.25	283.983	274.008	205.697	201.9	173.691	345.71	254.047	250.515	21.4429	34.3791	16.5798	149.536	183.954	109.909		110.602	114.205	100.421	446.105	365.655	411.877	279.703	271.445	295.388	25.6461	24.3572	24.9531	94.7106	243.925	102.068		305.104	163.62	281.172	631.738	616.213	556.702	319.456	348.68	309.881	47.9346	52.7413	50.827	74.0636	91.5952	68.0946
MYB73	Transcription factor MYB73	MSTRG.41777	99.0302	101.207	87.7421	26.2721	42.8064	26.092	98.6749	36.6893	40.0001	2.89256	0.892554	0.437139	22.4581	29.1179	14.1406		19.3711	19.4016	17.4184	70.9163	64.7434	75.0398	25.2364	26.1574	31.1154	2.5504	1.16939	0.75511	7.8679	14.0057	11.2245		26.8292	34.7203	25.0303	87.2692	55.4594	59.8014	17.4743	16.8671	8.39236	1.26048	1.2683	0.885261	6.6806	9.52432	4.58645
MYB4-like	MYB-like transcription factor 4	MSTRG.18625	11.0623	10.2701	9.87678	7.83989	7.0626	4.61562	3.04101	1.83858	3.98005	12.3233	18.2385	11.0571	5.72165	5.09707	3.35905		15.9817	14.6915	17.5071	7.19855	8.91755	7.6855	9.78403	9.00536	10.8196	7.19076	4.1688	2.78479	2.47472	3.85019	3.8945		17.9801	20.1566	15.8847	9.74258	10.4651	10.5408	2.94309	11.499	5.69583	17.286	21.2881	16.626	8.35899	13.9725	7.96615
bHLH1	Transcription factor IBH1	MSTRG.42352	2.85817	3.90301	2.81635	1.20005	1.21067	0.266806	6.23963	3.93549	5.73884	49.3436	26.9776	38.8771	62.2289	85.6763	74.9232		4.32538	3.92461	2.55543	2.37936	2.4925	3.26137	7.33119	6.65148	7.82825	37.2048	47.9301	61.341	14.73	46.5097	60.6258		2.77215	2.12751	2.85075	2.11882	1.58622	2.22675	15.7704	5.94286	5.75802	11.1356	14.2256	12.8642	18.0548	14.2427	17.3457
bHLH	bHLH transcription factor	MSTRG.26528	62.1649	58.5043	54.7629	48.6029	50.1169	32.7575	131.778	37.6468	61.3477	13.1947	4.79642	6.40605	35.357	45.237	21.3931		21.7095	16.0962	17.3317	202.409	162.235	192.703	97.7712	96.2981	135.531	5.66685	2.37921	2.13591	23.3581	23.2669	19.441		52.4512	48.5987	47.8264	108.035	108.517	100.961	24.2132	55.8568	19.6017	4.11583	3.32128	4.05803	34.7518	34.5795	31.2174
bHLH14-like	Transcription factor bHLH14-like	MSTRG.27334	36.928	33.1871	36.342	12.767	13.3852	9.25208	68.3076	49.6855	69.3506	57.048	52.0738	47.9223	26.3008	29.355	32.0399		20.4278	19.8257	17.6508	51.3161	55.8044	53.6105	48.5461	45.1617	44.8611	59.629	85.1619	101.655	46.4241	26.6792	56.4692		28.4474	30.8379	30.9343	28.6278	34.0912	30.3253	46.1638	53.108	73.2117	46.0155	55.6297	48.3467	70.4165	63.1923	55.7102
bHLH148	Transcription factor bHLH148	MSTRG.3042	0	0	0	0	0	0	0	0	0	0	0	0	0	0	0		0	0	0	0	0	0	0	0	0	0	0	0	0	0	0		0	0	0	0	0	0	0	0	0	0	0	0	0	0	0
bHLH10	Transcription factor bHLH10	MSTRG.12638	0.268877	0.391079	0.410857	0.423779	0.269341	0.31418	0.05336	0.161565	0.192118	0.486728	0.761495	0.500663	0.614846	0.494367	0.266881		0.626758	0.612121	0.704163	0.265238	0.200691	0.292912	0.105117	0.036416	0.168568	0.131111	0.120554	0.071902	0.110273	0.133262	0.064347		0.206092	0.5575	0.490844	0.060941	0.203263	0.290675	0.025037	0.011887	0.087185	0.065835	0	0.073767	0.065489	0.1139	0.065872
bHLH	bHLH domain-containing protein	MSTRG.27949	2.97656	2.61826	3.2256	22.8131	21.794	25.2081	0.453903	9.78885	1.78662	0.095059	0.267338	0.129474	0.456919	0.46306	0.50075		12.8629	15.0502	15.096	0.381563	0.50965	0.550121	0.270533	0.287002	0.519042	0.379432	0.274339	0.277105	0.422907	4.16265	0.43236		3.23842	2.41158	2.44191	0.851621	1.05528	0.963326	0.325561	0.266417	0.326993	0.288075	0.076106	0.14445	0.228494	0.991457	0.905505
WD40	WD40	MSTRG.15855	26.1637	25.2459	23.3866	4.99755	11.4799	3.81158	7.57178	3.804	4.84254	7.42095	6.60903	12.7772	16.4296	19.9523	15.3032		14.1095	8.91202	4.51434	11.4209	11.5544	2.92349	2.57445	9.337	8.66298	6.40106	5.78642	5.19116	7.86713	2.50742	9.83894		8.17221	9.00121	11.0713	6.63409	6.95309	6.75027	6.33982	3.06656	2.46888	5.0176	1.08288	5.16752	5.43487	6.43086	6.2015
NAC10	NAC domain-containing protein 10	MSTRG.21518	26.1165	24.4544	27.6207	26.5462	10.4452	8.61317	873.653	1079.99	963.05	1685.55	1992.7	2228.5	810.645	205.721	1911.48		43.899	29.9246	37.0955	179.646	290.906	248.731	1029.92	612.137	1240.64	313.222	728.329	810.277	890.649	348.422	1635.96		11.572	15.6661	22.1649	57.6883	129.735	62.4704	1388.82	1004.02	1648.2	1399.37	1731.85	2107.9	1636.35	932.24	2277.47
NAC71	NAC domain-containing protein 71	MSTRG.26615	27.0481	25.5572	28.3392	10.7687	11.4514	6.68518	30.4693	19.1447	30.9647	14.8166	32.7073	14.6225	20.2181	33.2943	16.8763		12.731	13.0163	12.5429	70.2751	68.8322	74.1167	84.9531	78.7959	79.7824	31.7137	45.3585	48.4584	37.8293	23.0489	45.4252		10.664	11.3367	11.5735	42.3228	36.0814	44.4724	47.6437	35.7308	58.8407	50.0515	44.805	43.5968	14.1935	14.3334	14.8717
NAC2-like	NAC domain-containing protein 2-like	MSTRG.24989	8.98383	8.44764	8.70674	4.67575	4.81585	3.17642	45.7425	33.5249	42.145	50.6821	35.839	49.0591	56.5676	63.8008	58.5363		4.49822	3.61539	3.79065	15.501	13.7226	16.9744	12.6334	12.7359	11.9634	41.3959	51.9741	40.4213	64.6847	44.0588	53.8307		5.18388	6.97428	6.22245	5.21118	5.02652	4.8397	33.8471	25.3949	17.5109	56.5941	60.1032	66.5416	108.203	98.7153	78.2098
NAC100	NAC domain-containing protein 100	MSTRG.20193	3.03613	4.04054	3.38579	1.66138	0.937417	1.35459	8.57264	7.4341	13.1914	8.25175	9.80799	10.2647	7.72232	5.36334	7.96016		2.34668	2.00964	1.84815	4.13212	4.33981	3.2739	11.8971	12.0389	10.8464	7.52019	4.85272	3.54062	3.71126	26.0601	6.35573		4.54883	3.54221	4.3768	3.94504	4.04952	4.15264	13.5363	22.5007	14.2574	28.9256	24.523	25.261	23.6267	27.1764	26.7638
NAC	NAC domain-containing protein JA2L	MSTRG.22923	133.182	121.464	119.561	68.6273	72.2069	69.7902	33.5498	89.9586	56.2901	15.7156	20.917	20.5467	15.4233	13.4788	17.1179		67.6091	61.4742	62.786	20.1833	16.2437	18.7871	8.2833	10.3205	8.90051	49.1235	27.4009	20.527	45.7918	317.321	62.9677		230.397	212.767	182.606	29.3922	22.9421	26.8833	34.2255	9.38071	12.376	57.2535	47.9207	52.4693	37.3892	67.1908	49.8366
NAC90	NAC domain-containing protein 90	MSTRG.31235	2.68372	2.54393	3.29481	5.00156	5.7112	1.85537	18.2114	10.0128	10.2102	2.75862	0.652811	0.557729	5.74174	7.47131	2.63564		0.197879	0.975223	0.109126	3.91911	5.12002	4.43161	16.3334	21.0698	17.2644	0	0	0	13.673	13.7681	11.5173		0.1409	0.203424	0.163619	18.8933	22.9916	21.3163	10.0683	24.143	12.6246	0	0	0	0.540917	1.22673	0.536821
MADS2	Agamous-like MADS-box protein MADS2	MSTRG.28809	126.444	107.689	111.535	65.8032	59.6845	41.8803	238.121	142.092	182.377	402.371	357.719	358.22	167.785	176.814	184.644		83.9577	70.835	67.4054	114.695	121.402	148.352	148.899	146.321	121.675	408.631	437.161	342.348	382.976	229.965	379.161		164.828	168.359	145.904	205.373	205.029	215.535	344.67	315.162	208.815	583.564	585.456	489.115	536.661	590.317	413.87
MADS14	MADS-box transcription factor 14	MSTRG.20641	14.7829	11.3885	13.4888	7.16915	7.38533	4.26847	3.17595	3.59997	3.09081	5.88819	6.51863	5.82105	6.59137	7.7656	6.24224		12.7125	12.1613	13.0052	7.67148	8.16349	7.63596	4.25371	4.62923	4.18661	9.97634	6.98992	6.81995	9.05368	7.31717	7.2685		12.2185	15.1488	11.0194	15.2629	14.0045	13.2108	3.45928	3.54986	4.20157	7.52864	7.81467	6.19926	5.90159	10.9756	6.3934
MADS	Agamous-like MADS-box protein AGL29	MSTRG.21401	0.192641	1.83918	0.930259	0.753475	1.31551	0.537715	2.09055	2.01832	2.80397	15.1027	12.9082	11.0627	5.86827	6.41013	5.05013		1.13145	1.7242	1.4146	1.76619	2.51562	2.11523	2.85207	1.17185	2.44205	17.6519	26.9603	15.0806	25.3871	17.3496	19.7453		0.298997	0.396951	0.118707	3.58132	2.35929	3.43634	1.79784	2.56478	1.66662	9.26619	7.04064	6.41248	4.63545	5.11441	2.58077
MADS	MADS-box protein AGL24	MSTRG.10039	2.32059	2.61131	2.57683	18.6709	23.1827	22.3049	0.366756	10.7631	2.88156	0.866911	2.68447	0.822623	3.72091	2.26269	1.32447		15.881	17.4677	19.7103	0.658552	0.186984	0.485963	0.139798	0.010887	0.078438	0.603179	0.16994	0.71278	1.22551	50.5684	0.759227		7.85994	8.12795	6.62467	12.8072	13.9081	15.4179	2.34257	0	1.39627	1.70177	5.89259	2.68409	4.87418	9.61866	7.01225
MADS	Agamous-like MADS-box protein AGL30	MSTRG.6315	4.97977	5.10057	6.17952	3.23989	2.23025	1.86117	4.99108	3.89901	5.82226	13.7722	9.02675	10.3896	5.86673	5.46292	5.14806		5.5912	4.78545	4.19991	2.41747	3.41556	3.38838	7.64835	5.46023	4.60405	16.0287	19.7066	15.0105	13.5439	11.0621	11.0852		4.23809	5.02178	4.36785	4.26553	3.3735	4.29582	9.33015	6.25512	6.14036	16.1198	13.5249	12.3101	16.9336	13.2999	15.2176
ERF109	Ethylene-responsive transcription factor ERF109	MSTRG.41635	44.4719	53.7597	48.4313	29.1442	32.6469	19.9343	344.35	78.4665	66.9859	10.9031	0.635962	1.30074	134.513	149.256	83.1724		0.945313	0.897844	0.899714	67.4098	59.4031	62.4362	66.7809	66.2385	64.3028	4.00812	3.17112	1.99982	145.526	101.153	126.748		0.158445	0.221777	0.237531	75.566	67.0121	62.0942	56.6295	30.9929	13.899	1.82247	0.593324	0.80401	44.1449	43.4622	30.2096
ERF2	Ethylene-responsive transcription factor 2	MSTRG.15392	147.255	167.259	141.8	19.6537	18.2469	11.0925	35.9975	25.6313	31.0688	3.19787	4.8542	3.67129	21.4819	23.4363	21.3628		6.21801	4.90554	4.28807	57.5063	53.2734	54.3949	10.1228	9.39565	13.7712	2.30226	1.18276	0.911012	1.75596	7.76107	1.76303		43.6846	47.3029	46.8396	23.1811	22.6594	19.8767	17.8928	37.5514	31.6831	1.87185	2.29464	2.48142	16.2119	16.6607	12.8302
ERF61	Ethylene-responsive transcription factor ERF061	MSTRG.27765	44.983	50.4302	44.8634	28.8035	27.5714	17.5294	39.0321	19.681	29.6368	1.54099	1.20378	1.59671	11.1495	11.251	8.37804		52.7705	48.117	55.4771	139.935	130.546	130.502	56.6003	55.2526	77.8391	5.90901	8.84802	11.374	5.87758	6.25145	4.73814		80.1709	77.1976	88.5933	70.4025	80.1462	79.5658	18.2705	74.4207	52.7546	2.66154	2.39231	2.66798	10.6951	9.3852	9.75432
ERF	AP2/ERF and B3 domain-containing transcription repressor TEM1	MSTRG.6652	108.179	117.751	101.189	30.8876	31.7684	20.0159	54.5474	21.545	18.3685	3.08689	1.49174	1.62648	3.72798	4.8851	3.45492		3.81854	3.98743	3.0625	107.124	74.9515	91.9374	30.7285	35.8378	43.9877	2.89256	1.47416	0.376314	15.7144	7.82949	9.26242		49.1059	50.9291	48.1855	58.0151	52.0574	42.0707	11.5858	33.7475	25.8268	2.23164	1.62061	1.65384	2.4304	3.21565	1.94108
ERF106	Ethylene-responsive transcription factor ERF106	MSTRG.15395	138.473	168.406	159.916	29.2241	28.1668	20.1967	24.8612	18.4221	26.7613	20.3955	24.4855	30.0532	46.031	60.0141	65.5216		29.4691	29.6543	30.8366	74.4422	85.3622	66.2694	17.4614	23.664	32.0479	11.6375	14.1554	14.2858	11.6599	9.25217	16.1024		107.243	126.38	140.848	65.3241	69.8253	62.8168	13.1302	45.125	29.1928	19.8234	21.1618	20.0658	37.7331	41.5775	32.6599
ERF3	Ethylene-responsive transcription factor ERF003	MSTRG.17347	0.245644	0.342671	0.269788	0.70066	0.255819	0.319513	6.39775	5.96684	8.36778	5.74568	7.89377	4.77076	6.75665	10.167	6.94375		0.973218	1.55519	1.95479	6.62419	4.91193	7.73036	29.4193	30.2381	22.0217	84.6953	91.2433	58.4836	47.8474	27.1195	64.5668		0.07545	0.571148	0.238283	1.09387	1.00779	0.870927	10.156	2.06286	2.96468	8.22552	10.0848	7.58573	5.12753	4.60769	3.91842
ERF17	Ethylene-responsive transcription factor ERF017	MSTRG.38029	27.0692	30.7996	25.2387	17.4457	22.0046	9.21398	16.644	4.58865	6.86477	2.38281	0.3422	0.297848	6.90612	10.0146	6.57245		0.747908	0.602235	1.01723	33.7179	24.4169	28.0813	13.3103	9.59711	14.6972	0.407023	0.165718	0.125326	2.00484	2.51331	1.71279		1.5181	1.78961	0.926279	32.517	35.3713	25.8246	4.15658	7.52379	2.22038	0.197206	0.146477	0.151089	18.2367	17.8033	11.9797
ERF	AP2/ERF domain-containing protein	MSTRG.38364	52.4087	52.5048	49.4739	5.56029	4.74518	4.25211	28.4598	11.2474	7.02094	2.70236	0.657929	1.07424	7.65054	11.2617	3.02315		15.7591	11.9054	11.0124	2.90175	2.31549	2.4657	4.71823	3.80496	3.5615	0	0.061994	0	7.32885	6.67022	4.2387		72.1464	70.2053	55.9611	10.8087	9.52014	7.55662	9.85706	10.8122	7.69575	0.227091	0	0	0.056399	0.426816	0.142201
WRKY53	Probable WRKY transcription factor 53	MSTRG.14133	12.6533	13.4503	12.8197	19.6739	19.7263	10.2371	27.8916	13.5233	21.7327	1.40762	1.07986	0.687951	19.0859	32.039	12.8538		3.41836	2.85352	3.26071	37.9289	38.7725	37.1334	58.5441	56.0348	74.7374	0.555752	0.497866	0.596236	19.8303	15.1556	15.5592		3.68464	3.4908	4.12602	36.1554	42.311	38.1594	12.6197	42.8504	15.9278	1.12981	1.2695	0.840666	5.20719	6.20191	4.75602
WRKY53	Probable WRKY transcription factor 53	MSTRG.27750	23.981	23.5273	23.5702	51.9463	59.7299	26.8493	87.397	38.6537	53.3573	7.68737	2.05751	2.14591	27.6461	45.6051	21.4945		1.76564	1.95853	1.4788	54.4929	50.6069	52.4161	62.8637	69.8606	81.3946	0.785686	0.53381	1.05262	62.301	46.9851	55.8455		5.84133	8.2573	7.876	95.6925	110.624	104.96	38.3731	78.46	27.4872	1.3471	2.06717	1.73671	35.8681	38.8938	32.6575
WRKY11	Probable WRKY transcription factor 11	MSTRG.2715	26.8792	32.5354	28.1189	20.7916	20.8878	15.4986	42.1938	29.4787	33.7709	7.0216	8.34922	8.01574	20.1806	29.5322	17.8124		25.3827	21.4619	22.3328	41.8985	40.5758	35.5748	53.1875	58.5535	73.3901	9.6524	5.55383	4.14105	19.2262	31.7727	20.3088		28.6004	31.8977	32.8912	54.182	57.6795	44.9183	34.0293	77.6139	37.3216	9.08845	8.7743	8.1832	12.5347	11.3491	13.2689
WRKY17	Probable WRKY transcription factor 17	MSTRG.8438	23.1818	22.5719	23.5826	23.6042	27.6027	16.2393	29.6145	18.9392	22.7188	3.98267	3.42641	4.35558	6.49761	26.0937	14.7812		14.5001	13.7988	5.27608	23.7765	19.3596	20.4085	33.6775	38.9037	38.7327	3.62605	2.56325	1.48636	9.70849	7.94796	8.10765		21.4444	26.8627	21.056	46.0553	49.7747	37.4588	15.9101	43.665	21.6338	2.55491	3.84705	2.73705	7.93609	7.55207	7.57159
WRKY7	Probable WRKY transcription factor 7	MSTRG.8139	3.69501	4.94121	4.5025	7.53623	7.70101	4.38562	21.2729	9.3676	10.9523	9.3781	7.32981	10.2151	26.0304	37.799	19.1619		2.22786	6.46184	7.48427	11.8862	7.7269	8.78617	22.711	23.207	27.3949	7.2503	7.35044	6.96472	44.9166	37.8965	44.1902		3.07399	2.94683	3.44731	21.784	24.2305	22.0664	13.7452	21.4861	12.2279	13.0677	11.5749	11.7693	15.8069	15.9751	15.3292
WRKY40	Probable WRKY transcription factor 40	MSTRG.17409	31.9365	31.562	29.0263	13.3594	15.5746	7.21693	40.3352	18.5902	22.6782	7.57482	5.68896	8.3615	15.3168	21.8588	12.1306		2.2102	2.55335	2.24743	20.4711	23.042	25.3879	25.1274	27.237	30.6539	2.52063	1.99845	1.48291	21.494	17.6296	21.433		21.968	24.4576	24.5491	21.0736	25.7055	22.8879	8.74954	19.8875	7.51741	18.38	16.6512	14.8916	17.7769	19.2271	14.8465
WRKY74	Probable WRKY transcription factor 74	MSTRG.34643	1.08492	1.75239	1.2589	0.517651	0.837594	0.524817	1.17295	0.922894	1.30124	5.78171	4.31186	6.03378	3.3992	2.50806	4.02404		1.59891	2.22035	1.69943	1.09279	0.946808	0.889959	0.87307	0.672522	1.18108	10.4855	10.2433	6.87142	9.5123	12.6613	8.34977		1.71705	1.75386	1.8846	1.49887	2.40115	2.15051	1.344	1.20861	1.3732	8.92895	7.82299	9.00039	7.90974	8.94082	9.5477
WRKY24	WRKY transcription factor WRKY24	MSTRG.33887	7.24881	8.71705	8.73453	8.85581	8.34731	4.32655	15.9989	7.00677	15.5488	1.2071	0.549504	1.01342	10.6223	12.8149	8.49797		0.832395	0.702187	0.592944	11.1014	10.845	12.4044	17.6521	18.6152	21.8285	0.149902	0.413875	0.519249	6.70351	3.87475	6.04332		2.40238	2.70337	2.80733	13.9296	12.9219	13.4896	6.77221	17.579	4.52944	1.51869	1.38605	0.992641	3.68591	5.68912	3.28962
WRKY76	WRKY transcription factor WRKY76	MSTRG.7627	9.26081	8.42034	10.4641	10.0901	7.95239	4.6764	26.2625	14.1692	15.5486	2.65346	1.54615	1.10024	8.28045	13.2298	3.98974		1.23312	2.51619	2.00469	20.499	23.1855	22.9964	27.4592	27.4526	24.5881	0.083116	0.378596	0.236058	45.7093	30.5706	34.1251		2.71341	2.89972	2.74668	24.0028	24.5082	25.6545	13.8167	18.0993	7.8133	0.747422	0.312204	0.401745	4.31108	3.30009	2.97119
bZIP43	Basic leucine zipper 43	MSTRG.19898	21.3398	25.4133	21.7251	12.591	12.399	10.8717	2.59077	2.89545	6.37449	14.4699	20.225	17.5471	40.0551	18.2908	36.2198		16.1367	16.2448	15.4007	4.63905	5.13159	5.21154	3.78126	6.73316	2.59237	86.165	21.0248	13.9335	20.5566	31.2109	25.3511		8.37903	7.11982	9.04875	8.80019	12.4999	9.70088	2.51612	1.65613	3.92984	12.4563	3.31316	5.08157	10.3463	7.26957	26.2818
bZIP4	Basic leucine zipper 4	MSTRG.32776	22.1828	20.484	22.1061	6.53615	5.36398	4.91424	185.812	107.015	146.875	35.628	49.3524	33.2989	75.1239	88.9045	57.5899		13.883	15.5503	15.9612	37.7499	29.061	34.4084	191.166	181.928	178.638	85.4851	74.8921	60.7549	84.5879	57.0663	94.1404		16.0914	15.1432	14.5804	4.94096	5.81072	6.49649	311.107	159.345	198.156	35.3712	30.7252	35.794	24.7063	19.5897	23.6987
bZIP34	Basic leucine zipper 34	MSTRG.22776	6.78136	8.63391	9.1835	0.132671	0.18585	0.172006	9.08688	4.88391	5.70659	0.911903	3.42206	0.968819	15.2572	18.034	13.5267		0.273079	0.326637	0.272633	3.90061	3.9974	4.08484	5.37213	4.59722	7.1559	2.36759	4.01376	6.19482	9.71215	6.05246	9.8874		2.98839	3.77741	3.03753	2.23898	2.41463	2.14477	6.28093	4.26021	3.19659	8.92207	9.91112	9.34329	1.38143	1.84105	1.96748

## Sheet: Table S4
Supplementary Table S4. The metabolites existed only in the dark-red and yellow fruits of Chinese cherry
Index	Compounds	Class II	Fold Change (PZB vs. HP31)	Log2FC (PZB vs. HP31)	VIP
Dark-red fruits
Smsp002643	Pelargonidin-3-O-rutinoside	Anthocyanidins	1.05492e+07	23.3306	1.39519
pmf0203	Peonidin-3-O-glucoside	Anthocyanidins	967911	19.8845	1.39356
Hmmp002248	Pelargonidin-3-O-glucoside-5-O-arabinoside	Anthocyanidins	40340.6	15.2999	1.39394
pme3392	Pelargonidin-3-O-glucoside	Anthocyanidins	5.6878e+06	22.4394	1.3946
Smsp001963	Cyanidin-3-O-glucoside-5-O-diglucuronide	Anthocyanidins	3547.18	11.7925	1.39242
Lmsp003161	Kaempferol-3-O-sophoroside-7-O-rhamnoside	Flavonols	34653.5	15.0807	1.3916
pmp001105	Kaempferol-3-O-neohesperidoside-7-O-glucoside	Flavonols	34653.5	15.0807	1.3916
Zmhp005586	Rhodiosin	Flavonols	332879	18.3446	1.38852
Lmyn004037	Eriodictyol-7-O-(6''-O-galloyl)glucoside	Flavanones	2149.68	11.0699	1.38239
MWSHY0019	Hesperetin-7-O-neohesperidoside(Neohesperidin)	Flavanones	183222	17.4832	1.38864
Hmgp002148	Nepetin-7-O-alloside	Flavones	54901.7	15.7446	1.39503
pmn001702	Tetahydroxyflavone-7-O-glucuronide	Flavones	3666.68	11.8403	1.39519
mws0853	Sinapyl alcohol	Phenolic acids	6860.71	12.7441	1.39528
Lmsn008212	2,3,19-Trihydroxyurs-12-en-23,28-dioic acid	Triterpene	1165.2	10.1864	1.38294
Yellow fruits
Zmmp002007	Cyanidin-3-O-(6''-O-p-coumaroyl)glucoside-5-O-glucoside	Anthocyanidins	3.3089e-06	-18.2052	1.39287
Lmjp002491	Cyanidin-3-O-(6''-O-p-coumaroyl-2''-O-xylosyl)glucoside	Anthocyanidins	0.000138232	-12.8206	1.39434
pmb0558	Delphinidin-3-O-(3'',6''-O-dimalonyl)glucoside	Anthocyanidins	0.000566223	-10.7863	1.39533
MWSHY0162	Quercetin-3-O-sophoroside (Baimaside)	Flavonols	6.85467e-07	-20.4764	1.39395
pmp001310	6-Hydroxykaempferol-3,6-O-Diglucoside	Flavonols	6.01377e-07	-20.6652	1.39508
Zmhp002730	6-Hydroxykaempferol-6,7-O-Diglucoside	Flavonols	6.50688e-07	-20.5515	1.39494
Hmgp001888	Patuletin-3-O-rutinoside	Flavonols	0.000345409	-11.4994	1.39163
Lmbp002336	Quercetin-3-O-(2''-O-rhamnosyl)galactoside	Flavonols	1.27772e-06	-19.578	1.39537
Hmpn005101	Sieboldin	Chalcones	5.98037e-05	-14.0294	1.39388
mws0576	3-Hydroxybutyric acid	Organic acids	4.70894e-05	-14.3742	1.39467
Lmsn000954	Dambonitol	Saccharides	9.91947e-06	-16.6213	1.39508

## Sheet: Table S5
Supplementary Table S5. Classes and peak areas of the identified flavonoids compounds in dark-red and yellow fruits of Chinese cherry
Class II	Number	Index	Compounds	Fold Change (PZB vs. HP31)	Log2FC (PZB vs. HP31)	VIP	P-value	Type	Molecular weight	Fomular	Ionization model	HP31-1	HP31-2	HP31-3	PZB-1	PZB-2	PZB-3
Anthocyanins	52
		pme1773	Cyanidin-3-O-rutinoside (Keracyanin)	6.22797	2.63876	1.26706	0.00107582	up	595.166	C27H31O15+	[M]+	2192271030	2048465122	2232822697	4.1338e+08	5.10295e+08	1.15757e+08
		Hmhp002834	Cyanidin 3-xyloside	80.136	6.32438	1.35987	0.0721292	up	419.097	C20H19O10+	[M]+	4.36572e+07	1.46789e+07	3.1437e+07	489394	482697	148168
		Smsp002643	Pelargonidin-3-O-rutinoside	1.05492e+07	23.3306	1.39519	0.0245548	up	579.171	C27H31O14+	[M]+	8.41634e+07	7.5794e+07	1.24872e+08	9	9	9
		Lmhp002242	Cyanidin-3-O-(2''-O-glucosyl)rutinoside	0.083394	-3.58391	1.20912	0.101302	down	757.219	C33H41O20+	[M]+	623277	132645	57403.5	3.66076e+06	4.83194e+06	1.26011e+06
		pme1793	Pelargonidin-3,5-O-diglucoside	13.9499	3.80219	1.36901	0.0477629	up	595.166	C27H31O15+	[M]+	625678	438682	918583	39586.7	40998.8	61561.5
		Lmpp003662	Delphinidin-3-O-(6''-O-p-coumaroyl)glucoside	1.51476	0.599088			normal	611.139	C30H27O14+	[M]+	2.25385e+07	1.75294e+07	2.07785e+07	1.10244e+07	9.03779e+06	2.01068e+07
		Lmtp001633	Peonidin-3-O-rutinoside-5-O-glucoside	0.843907	-0.244844			normal	771.234	C34H43O20+	[M]+	157249	152844	117786	160802	209204	137015
		pme1397	Pelargonidin	0.316569	-1.65941	1.31753	0.0313012	down	271.06	C15H11O5+	[M]+	639826	383866	498060	1.29478e+06	1.46217e+06	2.05007e+06
		pmf0027	Cyanidin-3-O-galactoside	475.018	8.89184	1.35369	0.0505964	up	449.108	C21H21O11+	[M]+	3.50366e+07	2.12452e+07	4.98432e+07	119106	94099.8	10206.4
		pmf0203	Peonidin-3-O-glucoside	967911	19.8845	1.39356	0.119968	up	463.123	C22H23O11+	[M]+	5.75685e+06	5.0305e+06	1.53462e+07	9	9	9
		Zmmp003591	Delphinidin-3-O-(2'''-O-p-coumaroyl)rutinoside	1.76898	0.822919			normal	757.219	C33H41O20+	[M]+	1.71187e+06	4.57231e+06	1.2334e+06	860978	2.62854e+06	760153
		Smlp002918	Malvidin-3-O-arabinoside	0.835179	-0.259842			normal	463.123	C22H23O11+	[M]+	103259	86160.6	84665.8	139672	85719.4	102784
		Zmbp002578	Cyanidin-3-O-(6''-O-acetyl)glucoside-5-O-glucoside	63.9532	5.99894	1.35291	0.00648611	up	653.171	C29H33O17+	[M]+	1.85693e+06	1.5583e+06	2.06907e+06	35170.8	43066.6	7517.58
		Lmyp001666	Cyanidin-3-O-glucosylrutinoside	0.215612	-2.21349	1.14826	0.171736	down	757.219	C33H41O20+	[M]+	347499	307086	253358	1.40725e+06	2.3153e+06	488457
		pmb0550	Cyanidin-3-O-glucoside (Kuromanin)	373.086	8.54336	1.11748	0.0343596	up	449.108	C21H21O11+	[M]+	4.46607e+07	2.81911e+07	5.63832e+07	205500	140886	9
		pmf0614	Peonidin-3,5-O-diglucoside	1.90929	0.933035			normal	625.176	C28H33O16+	[M]+	1.35801e+06	1.69969e+06	1.72708e+06	565720	921654	1.01868e+06
		Lmpp003789	Cyanidin-3-O-(6''-O-p-Coumaroyl)glucoside	1.1734	0.230699			normal	595.145	C30H27O13+	[M]+	3.6371e+06	4.08733e+06	4.02838e+06	2.13477e+06	3.89554e+06	3.98568e+06
		Lmtp003079	Peonidin-3-O-rutinoside	146.611	7.19585	1.37362	0.0606843	up	609.181	C28H33O15+	[M]+	4.72007e+07	4.82893e+07	9.71491e+07	582826	553328	177796
		Zbzp002425	Pelargonidin-3-O-sambubioside-5-O-glucoside	0.645831	-0.63077			normal	727.209	C32H39O19+	[M]+	189075	106636	116441	228558	173003	236613
		Zmbp102914	Pelargonidin-3-O-(6''-O-acetyl)glucoside-5-O-glucoside	1.94211	0.957627			normal	637.176	C29H33O16+	[M]+	1.95531e+06	2.02694e+06	1.99302e+06	957654	1.20423e+06	914804
		Zmcp002924	Cyanidin-3-O-(2''-O-glucosyl)glucoside	109.828	6.77911	1.30552	0.0310214	up	611.161	C27H31O16+	[M]+	9.38282e+07	6.69694e+07	1.26161e+08	1.20828e+06	1.33732e+06	67188.6
		Zmqp002952	Delphinidin-3-O-rutinoside-7-O-glucoside	0.0178064	-5.81146	1.38204	0.0448572	down	773.213	C33H41O21+	[M]+	352232	447114	259994	1.21794e+07	2.03662e+07	2.69465e+07
		Hmmp002248	Pelargonidin-3-O-glucoside-5-O-arabinoside	40340.6	15.2999	1.39394	0.0431419	up	565.155	C26H29O14+	[M]+	401102	213106	474989	9	9	9
		pme3392	Pelargonidin-3-O-glucoside	5.6878e+06	22.4394	1.3946	0.0536996	up	433.113	C21H21O10+	[M]+	5.30396e+07	2.89068e+07	7.16244e+07	9	9	9
		pme0444	Malvidin-3-O-glucoside (Oenin)	0.356119	-1.48957	1.34479	0.000916953	down	493.134	C23H25O12+	[M]+	136257	92829.7	141835	317824	382085	341658
		Happ001819	Peonidin-3-O-(6''-O-caffeoyl)glucoside	2.55594	1.35386	1.37673	0.00454826	up	625.155	C31H29O14+	[M]+	1.7702e+06	1.83091e+06	1.51271e+06	676632	720201	603922
		Lmcp004436	Cyanidin-3-O-(6''-O-caffeoyl)glucoside	0.217967	-2.19782	1.01773	0.269337	down	611.139	C30H27O14+	[M]+	1.50784e+06	490025	296862	1.27456e+06	2.12761e+06	7.12567e+06
		Lmpp003228	Petunidin-3-O-(6''-O-caffeoyl)glucoside	1.14144	0.190853			normal	641.15	C31H29O15+	[M]+	64777	73492.6	40271.6	78814.3	12984.7	64618.8
		Lmpp003958	Malvidin-3-O-(6''-O-p-coumaroyl)glucoside	1.17347	0.230783			normal	639.171	C32H31O14+	[M]+	134676	147433	92146.3	78983.5	134638	105308
		Hmm0001	Malvidin-3,5-di-O-glucoside	1.38824	0.473252			normal	655.187	C29H35O17+	[M]+	160203	138440	138818	61023.5	161470	92626.2
		Smsp001702	Cyanidin-3-O-rutinoside-5-O-glucoside	0.756938	-0.401752			normal	757.219	C33H41O20+	[M]+	172926	324415	399923	428949	594522	161916
		Cmzp002582	Malvidin-3-O-rutinoside	11.505	3.52419	1.30877	0.0183423	up	639.192	C29H35O16+	[M]+	101589	61859.1	87775.8	7717.44	11622.5	2496.14
		pme1786	Malvidin-3,5-di-O-glucoside (Malvin)	0.938025	-0.092302			normal	655.187	C29H35O17+	[M]+	57221.1	43575	45260	82911	43338.7	29456.3
		Lmcp005542	Delphinidin-3-O-(6''-O-caffeoyl)glucoside	2.33307	1.22223	1.29443	0.0417954	up	627.134	C30H27O15+	[M]+	489878	466359	310720	154749	209102	179193
		Smsp001963	Cyanidin-3-O-glucoside-5-O-diglucuronide	3547.18	11.7925	1.39242	0.0726721	up	801.172	C33H37O23+	[M]+	24295.3	21414.3	50064.2	9	9	9
		pmb0542	Cyanidin-3-O-(6''-O-malonyl)glucoside	0.993345	-0.00963331			normal	535.108	C24H23O14+	[M]+	31494.7	11528.8	27623.4	32189.8	13096	25834.5
		Smlp002877	Peonidin-3-O-arabinoside	1.47354	0.559282			normal	433.113	C21H21O10+	[M]+	166005	179144	238217	157021	138734	100140
		pme3391	Petunidin-3-O-glucoside	0.603329	-0.728983			normal	479.118	C22H23O12+	[M]+	139299	206112	168141	436747	201872	212577
		Smzp002754	Cyanidin-3-O-(6''-O-caffeoyl)sophoroside-5-O-glucoside	2.63522	1.39792	1.05281	0.118029	up	935.245	C42H47O24+	[M]+	5567.31	14503	13489.4	2499.48	6695.24	3540.36
		Zmmp002007	Cyanidin-3-O-(6''-O-p-coumaroyl)glucoside-5-O-glucoside	3.3089e-06	-18.2052	1.39287	0.103246	down	757.197	C36H37O18+	[M]+	9	9	9	2.46024e+06	4.47822e+06	1.22135e+06
		Lmqp001828	Delphinidin-3-O-(2'''-O-malonyl)sophoroside-5-O-glucoside	0.441047	-1.181	1.04749	0.0381151	down	875.209	C36H43O25+	[M]+	26570.9	75646.3	98600.1	182932	123874	148514
		Zmcp002986	Cyanidin-3-O-sophoroside-5-O-glucoside	3.59517	1.84606			normal	773.213	C33H41O21+	[M]+	126673	33624.6	29912.5	7673.91	38238.6	6994.51
		Lmqp002161	Cyanidin-3-O-rutinoside-5,3'-di-O-glucoside	0.40764	-1.29463			normal	919.271	C39H51O25+	[M]+	83347.1	40447.5	64927.8	62879.3	241477	158606
		Zmmp003478	Petunidin-3-O-(6''-O-p-coumaroyl)glucoside-5-O-rhamnoside	1.60288	0.680663			normal	771.213	C37H39O18+	[M]+	105847	93320.4	34614.1	58801.3	61558.8	25490.9
		pmb0541	Cyanidin-3-O-(6''-O-malonyl)glucoside-5-O-glucoside	4.93715	2.30368	1.06248	0.204276	up	697.161	C30H33O19+	[M]+	53111.2	13470.1	18903.4	1347.42	5119.15	10848
		Zmmp002642	Cyanidin-3-O-(6''-O-feruloyl)glucoside	67.2303	6.07104	1.08268	0.13709	up	625.155	C31H29O14+	[M]+	414636	54635.9	421416	9	5969.98	7269.32
		Smsp101702	Petunidin-3-O-rutinoside-O-arabinoside	118.002	6.88267	1.16113	0.142463	up	757.219	C33H41O20+	[M]+	207668	29020.7	256588	2259.18	9	1912.06
		Lmpp003815	Petunidin-3-O-(6''-O-p-Coumaroyl)glucoside	4.32126	2.11145	1.31858	0.0159105	up	625.155	C31H29O14+	[M]+	7.78274e+06	5.39528e+06	5.40461e+06	921728	1.34358e+06	2.03498e+06
		Lmjp002491	Cyanidin-3-O-(6''-O-p-coumaroyl-2''-O-xylosyl)glucoside	0.000138232	-12.8206	1.39434	0.0343957	down	727.187	C35H35O17+	[M]+	9	9	9	57630.3	48377	89316
		Lmcp001821	Delphinidin-3-O-galactoside	20.5082	4.35813	1.38713	0.00747259	up	465.103	C21H21O12+	[M]+	6.90154e+06	7.5951e+06	5.66017e+06	380113	361978	240772
		pme1398	Delphinidin-3-O-glucoside (Mirtillin)	20.5082	4.35813	1.38713	0.00747259	up	465.103	C21H21O12+	[M]+	6.90154e+06	7.5951e+06	5.66017e+06	380113	361978	240772
		pmb0558	Delphinidin-3-O-(3'',6''-O-dimalonyl)glucoside	0.000566223	-10.7863	1.39533	0.00301332	down	637.104	C27H25O18+	[M]+	9	9	9	15631.8	14529.7	17522.9
Proanthocyanidins	11
		HJN049	2α,3α-Epoxy-5,7,3',4'-tetrahydroxyflavan-(4β-8-catechin)	0.475905	-1.07125	1.25165	0.066893	down	576.127	C30H24O12	[M-H]-	139959	163387	114222	256386	238160	382875
		HJN053	2α,3α-Epoxy-5,7,3',4'-tetrahydroxyflavan-(4β-8-epicatechin)	0.56022	-0.835934			normal	576.127	C30H24O12	[M-H]-	184433	203704	207657	248365	281995	533140
		pmn001667	Procyanidin B4	0.573851	-0.801252			normal	578.142	C30H26O12	[M-H]-	2.07636e+06	1.71575e+06	2.52705e+06	3.58134e+06	3.46708e+06	3.96344e+06
		pme0432	Procyanidin A2	0.968043	-0.0468564			normal	576.127	C30H24O12	[M-H]-	104093	99555.6	119253	75915.6	118682	138963
		pmn001646	Procyanidin C1	0.588502	-0.764882			normal	866.206	C45H38O18	[M-H]-	3.92099e+06	3.75702e+06	4.30776e+06	5.19231e+06	6.13527e+06	9.03902e+06
		pmn001647	Procyanidin C2	0.532372	-0.909495			normal	866.206	C45H38O18	[M-H]-	1.96198e+06	1.55986e+06	1.69901e+06	2.87137e+06	3.31762e+06	3.61777e+06
		HJAP144	Galloylprocyanidin C2	0.596324	-0.745831			normal	1018.22	C52H42O22	[M+H]+	25333.1	32116.3	13075.3	37464.5	46796.1	34005.1
		pme0430	Procyanidin A1	0.841459	-0.249036			normal	576.127	C30H24O12	[M-H]-	23303.3	14874.3	33585	15730.1	33558.1	35995.4
		HJN074	Procyanidin A6	0.185795	-2.42822	1.36589	0.0142114	down	592.158	C31H28O12	[M-H]-	17345.4	11612.4	11633.6	85958.5	74398.6	58117.2
		pme0436	Procyanidin B3	0.764078	-0.388207			normal	578.142	C30H26O12	[M-H]-	2.56051e+07	1.28664e+07	1.23012e+07	3.27665e+07	1.25535e+07	2.11295e+07
		MWSHY0171	Procyanidin B2	0.439903	-1.18474	1.20658	0.0641817	down	578.142	C30H26O12	[M+H]+	2.94959e+07	1.82471e+07	1.93627e+07	5.35033e+07	3.47906e+07	6.42528e+07
Flavonols	132
		MWSslk254	Kaempferol-3-O-glucorhamnoside	0.870365	-0.200308			normal	594.159	C27H30O15	[M+H]+	3.41041e+06	2.47482e+06	3.46441e+06	1.91628e+06	3.73938e+06	5.08655e+06
		Lmwp003888	Kaempferol-3-O-sophoroside-7-O-glucoside	0.00290101	-8.42923	1.34533	0.00127778	down	772.206	C33H40O21	[M+H]+	894.301	19512	5181.78	2.72855e+06	3.02756e+06	3.06431e+06
		mws0089	Kaempferol-7-O-glucoside	1.60044	0.678467			normal	448.101	C21H20O11	[M-H]-	6.64933e+06	7.74894e+06	4.80216e+06	2.48674e+06	4.33957e+06	5.17067e+06
		Zmhp003784	Rhodioflavonoside	0.11352	-3.13898	1.38792	0.00273506	down	626.148	C27H30O17	[M+H]+	850640	611174	790212	5.90251e+06	7.03718e+06	6.89838e+06
		Lmhp002374	Quercetin-3-O-glucosyl(1→4)rhamnoside-7-O-rutinoside	3.80809	1.92907	1.32678	0.0444922	up	918.264	C39H50O25	[M+H]+	156986	242590	288652	48878.5	59277.7	72572.2
		Lmmp002463	Sexangularetin-3-O-glucoside-7-O-rhamnoside	4.10358	2.03688	1.19185	0.0161922	up	624.169	C28H32O16	[M+H]+	7.03496e+06	4.36762e+06	6.8008e+06	514717	2.11049e+06	1.81077e+06
		MWSHY0162	Quercetin-3-O-sophoroside (Baimaside)	6.85467e-07	-20.4764	1.39395	0.110611	down	626.148	C27H30O17	[M+H]+	9	9	9	7.62018e+06	9.13526e+06	2.26338e+07
		Lmfn004065	Morin-3-O-arabinoside	3.58498	1.84197	1.33186	0.0377608	up	434.085	C20H18O11	[M-H]-	865343	687808	501335	149579	201350	222152
		mws0913	Kaempferol-3-O-galactoside (Trifolin)	1.8536	0.890334			normal	448.101	C21H20O11	[M-H]-	8.11941e+06	8.88917e+06	5.86691e+06	2.59453e+06	4.20848e+06	5.53807e+06
		mws1329	Quercetin-7-O-glucoside	1.12067	0.164361			normal	464.096	C21H20O12	[M-H]-	7.31931e+06	6.56166e+06	8.19523e+06	7.11827e+06	5.98519e+06	6.59566e+06
		Lmsp004670	Kaempferol-3-O-glucoside-7-O-rhamnoside	0.973503	-0.0387426			normal	594.159	C27H30O15	[M+H]+	4.78131e+06	3.34093e+06	3.05369e+06	3.36131e+06	2.2318e+06	5.887e+06
		MWSHY0046	Quercetin-3-O-glucoside (Isoquercitrin)	3.93066	1.97477	1.31995	0.0116562	up	464.096	C21H20O12	[M+H]+	8.9737e+06	7.37466e+06	6.07793e+06	1.20435e+06	2.4092e+06	2.09194e+06
		pmb0645	Hesperetin-6-C-glucoside-7-O-glucoside	0.0893368	-3.4846	1.37914	0.0113812	down	626.185	C28H34O16	[M+H]+	551746	360929	603089	5.4134e+06	6.75627e+06	4.79719e+06
		Lmdp003286	Isohyperoside	2.42404	1.27741	1.14161	0.0363887	up	464.096	C21H20O12	[M+H]+	7.93521e+06	7.4788e+06	7.56126e+06	1.44053e+06	4.56715e+06	3.4704e+06
		Lmtp004044	Quercetin-3-O-apiosyl(1→2)galactoside	5.56074	2.47528	1.34104	0.059425	up	596.138	C26H28O16	[M+H]+	3.2826e+06	2.38656e+06	4.95089e+06	792413	580442	536971
		Lmcp004369	Quercetin-3',4'-dimethyl ether	2.42343	1.27705	1.34183	0.00474893	up	330.074	C17H14O7	[M+H]+	200604	210312	199092	68517.3	77987.8	105208
		Hmlp002975	Isorhamnetin-3-O-glucuronide-7-O-rhamnoside	1.17297	0.230165			normal	638.148	C28H30O17	[M+H]+	29293.7	24428	8973.93	19069.4	24836.4	9544.51
		Xmyp005654	Kaempferol-4'-O-glucoside	1.27901	0.355024			normal	448.101	C21H20O11	[M+H]+	1.54122e+08	7.23075e+07	1.10155e+08	7.83347e+07	6.65127e+07	118313826
		pmp000589	Quercetin-7-O-(6''-malonyl)glucoside	1.25671	0.329657			normal	550.096	C24H22O15	[M+H]+	153696	116809	119662	117528	96606.3	96331.7
		Zmhp003716	Rhodionidin	0.0953237	-3.39102	1.36397	0.0450227	down	610.153	C27H30O16	[M+H]+	672682	1.00217e+06	821607	5.37973e+06	9.57206e+06	1.12375e+07
		Zmhp005586	Rhodiosin	332879	18.3446	1.38852	0.224949	up	610.153	C27H30O16	[M+H]+	6.39102e+06	1.84978e+06	746939	9	9	9
		Smgp004575	Quercetin-5-O-β-D-glucoside	2.90478	1.53843	1.28004	0.00647568	up	464.096	C21H20O12	[M+H]+	7.74807e+06	9.50003e+06	6.91013e+06	1.75291e+06	3.73099e+06	2.83283e+06
		Lmjp002461	Quercetin-3-O-neohesperidoside	1.97566	0.982336			normal	610.153	C27H30O16	[M+H]+	2.22748e+07	2.53623e+07	1.95298e+07	1.01909e+07	9.27854e+06	1.45277e+07
		Lmjp003589	Kaempferol-3-O-(2''-apiosyl-4''-glucosyl-6''-malonyl)Glucoside	0.417876	-1.25885	1.30591	0.0421155	down	828.196	C35H40O23	[M+H]+	24246.5	32500.9	27890.2	51389.1	68260.2	82893.2
		pmp001311	6-Hydroxykaempferol-7,6-O-Diglucoside	1.31415	0.394129			normal	626.148	C27H30O17	[M+H]+	522274	363113	497897	414974	417633	220001
		MWSHY0067	Quercetin-3-O-rutinoside (Rutin)	1.28848	0.36567			normal	610.153	C27H30O16	[M+H]+	1.51421e+07	1.73966e+07	7.88917e+06	5.91777e+06	6.95394e+06	1.85047e+07
		Lmmp003091	Quercetin-3-O-(4''-O-glucosyl)rhamnoside	1.28848	0.36567			normal	610.153	C27H30O16	[M+H]+	1.51421e+07	1.73966e+07	7.88917e+06	5.91777e+06	6.95394e+06	1.85047e+07
		Hmcp005575	Quercetin-5,4'-di-O-glucoside	2.14392	1.10025	1.10857	0.0871244	up	626.148	C27H30O17	[M+H]+	439841	355058	219978	225052	138831	109492
		pmp001310	6-Hydroxykaempferol-3,6-O-Diglucoside	6.01377e-07	-20.6652	1.39508	0.0235386	down	626.148	C27H30O17	[M+H]+	9	9	9	1.03454e+07	1.78941e+07	1.66575e+07
		mws2186	Avicularin(Quercetin-3-O-α-L-arabinofuranoside)	2.26691	1.18073	1.25546	0.038527	up	434.085	C20H18O11	[M+H]+	857335	795691	533093	298954	259624	405782
		Lmyp004052	Quercetin-3-O-(6''-O-p-Coumaroyl)galactoside	13.7657	3.78301	1.1235	0.289903	up	610.132	C30H26O14	[M+H]+	1.0171e+07	2.37347e+06	810338	132999	331474	505681
		Lmwp003442	Amoenin	4.64385	2.21532	1.08988	0.0664669	up	448.101	C21H20O11	[M+H]+	2.82711e+07	1.17784e+07	2.69559e+07	6.831e+06	6.6498e+06	948044
		Lmpn006208	8-Methoxykaempferol-7-O-rhamnoside	0.0781059	-3.67843	1.28057	0.0270238	down	462.116	C22H22O11	[M-H]-	1779.44	781.558	5929.74	23819.5	41616.5	43272.1
		MWSHY0135	Isorhamnetin-3-O-rutinoside (Narcissin)	3.3596	1.74829	1.14632	0.0499392	up	624.169	C28H32O16	[M+H]+	211319	104335	194992	51541.1	20916.9	79537.9
		Zmhp002730	6-Hydroxykaempferol-6,7-O-Diglucoside	6.50688e-07	-20.5515	1.39494	0.0306389	down	626.148	C27H30O17	[M+H]+	9	9	9	8.95049e+06	1.55245e+07	1.70196e+07
		Zmcn003728	Kaempferol-3,7-O-diglucoside	6.39364	2.67664	1.35642	0.0437346	up	610.153	C27H30O16	[M-H]-	350292	205507	401340	46316.9	45237.7	58147.3
		Lmfn003760	Quercetin-4'-O-glucuronide	1.18725	0.247619			normal	478.075	C21H18O13	[M-H]-	69295.6	41970.4	65011.7	44181.9	43989.6	60304.7
		MWSHY0064	Isorhamnetin-3-O-neohesperidoside	2.88754	1.52984	1.32375	0.00239308	up	624.169	C28H32O16	[M+H]+	201172	227132	220540	55548.4	67624.4	101532
		Lmdp004267	Quercetin-3-O-(6''-O-p-Coumaroyl)glucoside	2.43562	1.28429	1.3644	0.012477	up	610.132	C30H26O14	[M+H]+	212746	187515	246099	86276.6	81576.2	97525.7
		Zmtp102903	Juglanin	2.49931	1.32153	1.3271	0.0487442	up	418.09	C20H18O10	[M+H]+	625298	415543	418724	217675	183321	182992
		Lmjp003231	Patuletin-3-O-glucoside	1.09806	0.134959			normal	494.106	C22H22O13	[M+H]+	205647	274243	218299	211033	216569	208236
		Xmyp004678	Kaempferol-3-O-(2-O-Xylosyl-6-O-Rhamnosyl)Glucoside	0.200505	-2.31829	1.11964	0.108766	down	726.201	C32H38O19	[M+H]+	6798.24	33018.8	6259.84	31182.6	87954.3	110667
		HJAP148	Kaempferol-3-O-sambubioside	1.81808	0.862414			normal	580.143	C26H28O15	[M+H]+	388181	334571	379980	143580	209107	253851
		MWSHY0132	Quercetin-3-O-rhamnoside(Quercitrin)	1.83392	0.874929			normal	448.101	C21H20O11	[M+H]+	520211	667383	559058	200236	330325	421854
		Lmpp003268	Kaempferol-3-O-rutinoside-7-O-glucoside	0.133231	-2.908	1.35306	0.048644	down	756.211	C33H40O20	[M+H]+	3.92924e+06	3.67187e+06	2.34729e+06	1.78316e+07	2.22675e+07	3.4571e+07
		Lmjp002596	Quercetin-3-O-sambubioside	4.66289	2.22122	1.34168	0.00306541	up	596.138	C26H28O16	[M+H]+	2.63122e+06	2.2391e+06	2.01705e+06	309926	584286	582849
		Lmdp003509	Quercetin-3-O-xyloside (Reynoutrin)	3.39869	1.76498	1.36954	0.0105672	up	434.085	C20H18O11	[M+H]+	1.47489e+06	1.3508e+06	1.09103e+06	380134	333606	438681
		Lmdp004892	Kaempferol-3-O-(6''-malonyl)galactoside	3.1809	1.66943	1.06761	0.224391	up	534.101	C24H22O14	[M+H]+	150732	54532.8	46737.7	14811.1	28281.4	36131.3
		Zmhp002640	6-Hydroxykaempferol-3-O-Rutinoside-6-O-glucoside	0.0211012	-5.56653	1.37604	0.0316352	down	772.206	C33H40O21	[M+H]+	1.25758e+06	924937	502599	2.90416e+07	4.29335e+07	5.52745e+07
		Lmsn002815	Kaempferol-3-O-rutinoside(Nicotiflorin)	0.970751	-0.0428271			normal	594.159	C27H30O15	[M-H]-	2.52212e+07	2.9156e+07	1.79731e+07	1.83339e+07	2.57762e+07	3.04202e+07
		HJN051	Tamarixetin-3-O-rutinoside	2.4176	1.27358	1.07141	0.158096	up	624.169	C28H32O16	[M-H]-	9272.32	9533.84	20251.2	4858.16	3240.66	8056.59
		Lmzn001894	Kaempferol-3-O-glucuronide	4.30615	2.1064	1.20433	0.0161287	up	462.08	C21H18O12	[M-H]-	62811.7	37760	53456.3	12993	18569.6	4206.7
		Lmsp003252	Isorhamnetin-3-O-sophoroside	1.0015	0.00216198			normal	640.164	C28H32O17	[M+H]+	84404.3	40759.9	40636.8	56582.6	46548.3	62421.8
		Lmjp004941	3,5,4'-Trihydroxy-7-methoxyflavone (Rhamnocitrin)	1.97563	0.982314			normal	300.063	C16H12O6	[M+H]+	23173.4	21041.6	132257	24855.2	8489.4	55979.6
		pmn001642	Kaempferol-3-O-(2''-O-acetyl)glucuronide	0.319781	-1.64484	1.10656	0.156072	down	504.09	C23H20O13	[M-H]-	200327	148954	235657	260120	664101	904962
		zjgp122057	7,8,3',4'-tetrahydroxyflavanonol	7.29065	2.86605	1.35448	0.0108224	up	304.058	C15H12O7	[M+H]+	686331	526218	776487	134352	73253.1	65215.2
		Lmmp002796	Gossypetin-3-O-rutinoside	5.21619	2.383	1.30601	0.1024	up	626.148	C27H30O17	[M+H]+	622663	491644	1.20228e+06	137915	187790	118410
		Zmcp002666	Quercetin-3,7-Di-O-glucoside	1.04044	0.0571932			normal	626.148	C27H30O17	[M+H]+	340692	212717	325071	408592	220602	215142
		mws0061	Quercetin-3-O-galactoside (Hyperin)	3.0415	1.60478	1.25024	0.00377263	up	464.096	C21H20O12	[M-H]-	5.40454e+06	4.9284e+06	4.15811e+06	856711	1.71446e+06	2.19328e+06
		MWSHY0151	Quercetagetin; 3,3',4',5,6,7-Hexahydroxyflavone	0.929742	-0.105098			normal	318.038	C15H10O8	[M+H]+	82686.8	84135.8	111720	94640.8	78789.3	126161
		pme2493	Kaempferol-3,7-O-dirhamnoside (Kaempferitrin)	0.530386	-0.914886			normal	578.164	C27H30O14	[M+H]+	4.35973e+06	4.29452e+06	4.25514e+06	6.06066e+06	7.94738e+06	1.03316e+07
		mws0856	Quercetin-4'-O-glucoside (Spiraeoside)	3.44316	1.78373	1.32047	0.00520654	up	464.096	C21H20O12	[M-H]-	6.31514e+07	4.87227e+07	6.56125e+07	1.12758e+07	1.96529e+07	2.06189e+07
		HJAP023	Kaempferol-6,8-di-C-glucoside-7-O-glucoside	0.0528762	-4.24124	1.36277	0.0403478	down	772.206	C33H40O21	[M+H]+	119355	176903	79128.1	1.43556e+06	2.89988e+06	2.7639e+06
		Lmmp003817	Kaempferol-3-O-(6''-malonyl)glucoside	2.10645	1.07482			normal	534.101	C24H22O14	[M+H]+	141621	35875.5	31382.8	34787.7	34564.2	29809.8
		Lssp210058	Quercetin-3-O-robinobioside	2.04813	1.03431			normal	610.153	C27H30O16	[M+H]+	1.87817e+07	2.51822e+07	2.32422e+07	1.28394e+07	3.7862e+06	1.61878e+07
		Hmjp003123	Quercetin-5-O-glucuronide	1.02094	0.0299019			normal	478.075	C21H18O13	[M+H]+	50664.2	85947.4	55398.8	56842	64509	66720.7
		pmb0618	Hesperetin-8-C-glucoside-3'-O-glucoside	1.00515	0.00741517			normal	626.185	C28H34O16	[M+H]+	301365	192165	216261	270422	192718	243012
		Zblp004717	3'-methoxyquercetin-3-O-L-rhamnosyl(1→2)-glucopyranoside	3.48653	1.80179	1.19098	0.0404983	up	624.169	C28H32O16	[M+H]+	4.97202e+06	3.76936e+06	6.99759e+06	652410	1.76532e+06	2.0965e+06
		Zmhp005139	Tamarixetin-3-O-(6''-malonyl)glucoside	1.51467	0.599006			normal	564.111	C25H24O15	[M+H]+	34201.7	25636.4	33609	12650.3	21795	27249.4
		Lmmn003398	Kaempferol-3-O-(6''-O-acetyl)glucoside	1.09921	0.136466			normal	490.111	C23H22O12	[M-H]-	87138.8	55346.2	34985.3	65367.2	64027.1	32058.5
		Xmgp003697	Cannabiscitrin	1.509	0.593591			normal	480.09	C21H20O13	[M+H]+	584413	399868	242653	253252	202589	357239
		Lmfp003403	Quercetagetin-7-O-glucoside(Quercetagitrin)	1.509	0.593591			normal	480.09	C21H20O13	[M+H]+	584413	399868	242653	253252	202589	357239
		HJAP154	Galloylisorhamnetin	1.44586	0.531925			normal	468.069	C23H16O11	[M+H]+	224320	462755	595162	359393	267896	259546
		Lmsp003729	Myricetin-3-O-rutinoside	1.23519	0.304731			normal	626.148	C27H30O17	[M+H]+	1.08922e+06	1.0941e+06	9	462203	401532	903873
		Zmhp002401	Viscumneoside IV(Rhamnazin-3-O-(6''-hydroxymethylglutaryl)glucoside)	1.36261	0.446368			normal	636.169	C29H32O16	[M+H]+	426607	307327	243683	339026	196842	181593
		GQ512001	Quercetin-3-O-glucosyl(1→3)rhamnosyl(1→6)Galactoside	22.8557	4.51448	1.34782	0.135723	up	772.206	C33H40O21	[M-H]-	73496.8	47862.6	175312	3375.12	4715.65	4889.45
		Lmln001951	Quercetin-3-O-(6''-O-arabinosyl)glucoside	1.99419	0.995805			normal	596.138	C26H28O16	[M-H]-	93973.3	86351.2	119546	32001.2	51012	67358.5
		Lmyp004516	Quercetin-3-O-(2''-O-p-Coumaroyl)galactoside	2.11853	1.08306	1.16675	0.126028	up	610.132	C30H26O14	[M+H]+	234192	162188	342613	104365	137720	106739
		Zmcp003989	Kaempferol-3-O-rhamnosyl(1→2)glucoside	75.01	6.22901	1.3632	0.0583332	up	594.159	C27H30O15	[M+H]+	9.6298e+07	4.03266e+07	1.03484e+08	1.39461e+06	1.35292e+06	453489
		Lmmp003903	Kaempferol-3-O-(2''-O-acetyl)glucoside	2.56104	1.35673			normal	490.111	C23H22O12	[M+H]+	450931	100795	123935	31470.5	138719	93633.9
		pmn001637	Kaempferol-3-O-arabinoside (Juglanin)	1.98063	0.985957			normal	418.09	C20H18O10	[M-H]-	83425.6	87376.9	37377.6	32371.5	28994	43742.7
		pma0214	6-C-Methylquercetin-3-O-glucoside	3.7388	1.90258	1.31651	0.00145683	up	478.111	C22H22O12	[M+H]+	963974	913597	1.14422e+06	294567	350124	163534
		Lmmp002529	Gossypetin-3-O-rutinoside-8-O-rhamnoside	0.0291551	-5.10011	1.35402	0.0744305	down	772.206	C33H40O21	[M+H]+	530008	547846	201872	7.95734e+06	2.21289e+07	1.38075e+07
		Lmtp002818	Kaempferol-3-(2'',6''-di-O-rhamnosyl)-glucoside	54.4643	5.76724	1.38941	0.0336147	up	740.216	C33H40O19	[M+H]+	189261	151941	280832	4117.63	3680.98	3622.33
		Zmsp004363	Quercetin-3-O-(6''-O-acetyl)glucoside	1.64658	0.719475			normal	506.106	C23H22O13	[M+H]+	414737	298928	302486	220186	297281	99661.3
		Lmdp002969	Myricetin-3-O-galactoside	1.11303	0.154488			normal	480.09	C21H20O13	[M+H]+	443933	299168	300328	274074	327475	335922
		pmp000980	Maohuoside A	0.741515	-0.431452			normal	548.189	C27H32O12	[M+H]+	374908	487799	402273	847633	360429	497877
		Hmcp004055	Quercetin-5,7,4'-tri-O-glucoside	0.0029032	-8.42814	1.39163	0.0129731	down	788.201	C33H40O22	[M+H]+	36123.5	19802.6	30337.9	1.14839e+07	1.05291e+07	7.70044e+06
		Lmyp003500	Kaempferol-3-O-(2''-galloyl)galactoside	0.551969	-0.857341			normal	600.111	C28H24O15	[M+H]+	59311.2	39715.8	36955.9	35391	74228.3	136740
		Lmyp003599	Kaempferol-3-O-(6''-galloyl)glucoside	0.551969	-0.857341			normal	600.111	C28H24O15	[M+H]+	59311.2	39715.8	36955.9	35391	74228.3	136740
		HJAP061	Quercetin-3-O-(2''-O-arabinosyl)rutinoside	1.96673	0.9758			normal	742.196	C32H38O20	[M+H]+	380019	141822	8729.04	95577.9	78047.9	96147.2
		pme1605	Kaempferol-3-O-robinobioside(Biorobin)	0.665896	-0.58663			normal	594.159	C27H30O15	[M-H]-	3.26588e+06	2.55974e+06	1.56987e+06	2.65688e+06	4.46614e+06	3.98303e+06
		Lmsp004166	Quercetin-3-O-glucoside-7-O-rhamnoside	1.80135	0.849076			normal	610.153	C27H30O16	[M+H]+	1.02478e+07	2.19758e+07	2.00624e+07	7.36332e+06	9.02169e+06	1.26411e+07
		Lmbp002336	Quercetin-3-O-(2''-O-rhamnosyl)galactoside	1.27772e-06	-19.578	1.39537	0.00770555	down	610.153	C27H30O16	[M+H]+	9	9	9	6.28674e+06	6.56759e+06	8.27698e+06
		HJAP128	Isorhamnetin-3-O-rutinoside-7-O-rhamnoside	1.79776	0.846201			normal	770.227	C34H42O20	[M+H]+	107405	173072	70644.4	42714.7	105266	47329.2
		Cmqp004699	Fisetin	0.50215	-0.99381			normal	286.048	C15H10O6	[M+H]+	10644.4	25271	13606.1	24555.7	29901.7	44161.7
		Lmsp003161	Kaempferol-3-O-sophoroside-7-O-rhamnoside	34653.5	15.0807	1.3916	0.077143	up	756.211	C33H40O20	[M+H]+	128245	392779	414620	9	9	9
		pmp001105	Kaempferol-3-O-neohesperidoside-7-O-glucoside	34653.5	15.0807	1.3916	0.077143	up	756.211	C33H40O20	[M+H]+	128245	392779	414620	9	9	9
		Lmdp004461	Quercetin-3-O-(6''-O-feruloyl)glucoside-7-O-rutinoside	0.0733808	-3.76845			normal	948.254	C43H48O24	[M+H]+	9	16586.7	6941.79	40053.1	203563	77141.1
		pmp001309	6-Hydroxykaempferol-7-O-glucoside	1.90542	0.930109			normal	464.096	C21H20O12	[M+H]+	1.67769e+07	8.8815e+06	1.73185e+07	5.12258e+06	7.8104e+06	9.62208e+06
		HJAP005	Laricitrin-3-O-glucoside	1.00121	0.00175079			normal	494.106	C22H22O13	[M+H]+	313014	295965	214279	279787	191696	350777
		Zmcn004806	Kaempferol-3-p-coumaroyldiglucoside	0.0521397	-4.26147	1.37412	0.00361594	down	756.19	C36H36O18	[M-H]-	1694.78	2726.95	4163.64	53589.1	61671.1	49400.8
		Lmjp002867	Kaempferol-3-O-neohesperidoside	0.943041	-0.0846075			normal	594.159	C27H30O15	[M+H]+	3.76745e+06	4.12031e+06	3.91009e+06	2.312e+06	3.20703e+06	6.9914e+06
		Lmpp005784	6-Methoxyquercetin-3-O-Xyloside	0.51743	-0.950565			normal	464.096	C21H20O12	[M+H]+	24766.5	20327.6	3327.2	28088	38682.6	26809.8
		HJAP155	Laricitrin-3-O-xyloside	0.51743	-0.950565			normal	464.096	C21H20O12	[M+H]+	24766.5	20327.6	3327.2	28088	38682.6	26809.8
		Hmgp001888	Patuletin-3-O-rutinoside	0.000345409	-11.4994	1.39163	0.0611077	down	640.164	C28H32O17	[M+H]+	9	9	9	13646.8	36874.7	27646.9
		Lnrp102163	Quercetin-3-O-rutinoside-7-O-rhamnoside	3.46279	1.79194	1.26697	0.0122391	up	756.211	C33H40O20	[M+H]+	919878	847786	603298	129860	328493	226343
		MWSHY0029	Quercetin	17.5009	4.12935	1.36139	0.0137815	up	302.043	C15H10O7	[M+H]+	219391	153150	227523	6229.98	17906.3	10151.5
		Lmjp002906	Rhamnetin-3-O-Glucoside	2.61834	1.38865	1.28503	0.0246342	up	478.111	C22H22O12	[M+H]+	1.10078e+06	999003	1.49941e+06	488596	562534	323477
		Zmgp002857	Quercetin-3-O-α-rhamnosyl (1→2)-[α-rhamnosyl (1→6)]-β-glucoside	1.9358	0.952928			normal	756.211	C33H40O20	[M+H]+	3.78602e+06	2.10674e+06	2.73841e+06	1.69131e+06	1.87551e+06	891897
		Lmsp003939	Isorhamnetin-3-O-galactoide-7-O-rhamnoside	8.71441	3.1234	1.36439	0.0216126	up	624.169	C28H32O16	[M+H]+	129240	167461	211015	16024.9	27137.6	15099.1
		Lmsp004045	Isorhamnetin-3-O-glucoside-7-O-rhamnoside	8.71441	3.1234	1.36439	0.0216126	up	624.169	C28H32O16	[M+H]+	129240	167461	211015	16024.9	27137.6	15099.1
		Zmhp004034	Rhodiolgin	1.48905	0.574391			normal	464.096	C21H20O12	[M+H]+	9.91946e+06	7.5829e+06	7.41687e+06	5.56442e+06	4.79434e+06	6.37624e+06
		Lmqp002170	Kaempferol-3-O-sophorotrioside	1.71515	0.778337			normal	772.206	C33H40O21	[M+H]+	55330.8	31404.2	62551.6	17083.4	17974.9	51981.7
		Lmsp003790	Isorhamnetin-3-O-sophoroside-7-O-rhamnoside	0.429798	-1.21827	1.1205	0.0400941	down	786.222	C34H42O21	[M+H]+	37468.3	22514.2	65610.5	72469.8	100831	118913
		Lmfp004055	Morin-3-O-xyloside	3.27559	1.71176	1.24722	0.0148191	up	434.085	C20H18O11	[M+H]+	786138	550598	538116	130195	130310	311865
		HJAP064	Isorhamnetin-3-O-(6''-malonyl)glucoside	0.981178	-0.0274129			normal	564.111	C25H24O15	[M+H]+	6088.81	16841.6	9448.57	3321.92	18578.8	11099.4
		Lmmp002963	6-C-Methylquercetin-3-O-rutinoside	3.74202	1.90382	1.3125	0.00426882	up	624.169	C28H32O16	[M+H]+	4.40605e+06	3.5612e+06	4.9095e+06	1.05476e+06	1.6398e+06	746559
		Zmpp002571	Robinetin	0.68157	-0.553066			normal	302.043	C15H10O7	[M+H]+	263751	362808	337337	462319	485844	466065
		HJAP119	Rhamnetin-3-O-Rutinoside-5-O-rhamnoside	0.950238	-0.0736395			normal	770.227	C34H42O20	[M+H]+	49959.6	58686.9	61767.3	68867.1	61165.8	49305.2
		Hmln002199	Quercetin-3-O-(6''-O-acetyl)galactoside	1.61259	0.689378			normal	506.106	C23H22O13	[M-H]-	23995.3	14086.6	19787.1	8053.85	16126.9	11705.1
		Hmcp001598	Isorhamnetin-3-O-(2''-O-xylosyl)glucoside	2.23088	1.15761	1.07972	0.0878966	up	610.153	C27H30O16	[M+H]+	34068.3	20197.1	19145.3	5781.65	11611.6	15513.3
		HJAP127	Quercetin-3-O-(2''-O-Rhamnosyl)rutinoside	2.13198	1.0922	1.14121	0.0366068	up	756.211	C33H40O20	[M+H]+	2.75355e+06	1.752e+06	2.31831e+06	651150	1.54226e+06	1.0073e+06
		Hmmp002121	Isorhamnetin-3-O-gallate	1.42348	0.509421			normal	468.069	C23H16O11	[M+H]+	396817	516172	527722	396710	281160	334236
		Hmcp001529	Quercetin-3-O-sophorotrioside-7-O-arabinoside	0.645662	-0.631149			normal	920.243	C38H48O26	[M+H]+	2092.81	4233.99	9	3343.24	3856.12	2613.52
		HJAP006	Syringetin-7-O-glucoside	0.692949	-0.529178			normal	508.122	C23H24O13	[M+H]+	83071.3	38804.8	52513.9	117793	69793.1	64077.1
		Hmcp001769	Quercetin-3-O-rhamnosyl(1→2)arabinoside	0.804032	-0.314675			normal	580.143	C26H28O15	[M+H]+	206841	107061	164782	99299.2	249458	246599
		Hmcp001578	Isorhamnetin-3,7-O-diglucoside	0.812146	-0.300189			normal	640.164	C28H32O17	[M+H]+	104270	72701	207408	114115	230298	128875
		Lmyp003348	Kaempferol-3-O-(6''-galloyl)galactoside	0.415629	-1.26663	1.24462	0.0332548	down	600.111	C28H24O15	[M+H]+	41907.6	25935.1	45183	67860.7	110468	93610.1
		mws0919	Kaempferol-3-O-rhamnoside (Afzelin)(Kaempferin)	2.40112	1.26371			normal	432.106	C21H20O10	[M-H]-	37257.2	9731.18	16377.5	16613.3	7710.11	2066.72
		Hmcp001589	Isorhamnetin-3-O-rutinoside-4'-O-glucoside	0.52578	-0.927468			normal	786.222	C34H42O21	[M+H]+	52964.6	44665.4	34082	56906.6	103157	90444.4
		Lmmp003271	Gossypetin-8-O-β-D-glucoside	1.29113	0.368632			normal	480.09	C21H20O13	[M+H]+	162677	42378	57396.3	48302.7	66719.1	88251.2
Flavones	96
		pmb0634	Isoorientin-7-O-(6''-feruloyl)glucoside-O-glucoside	0.862726	-0.213026			normal	948.254	C43H48O24	[M+H]+	32292.6	35559.6	12286	22437.1	20783.7	49668.7
		MWS20147	Luteolin-3'-O-glucoside	2.87423	1.52318	1.31046	0.00555897	up	448.101	C21H20O11	[M+H]+	4.34109e+07	3.98151e+07	3.18661e+07	9.6705e+06	1.27206e+07	1.76517e+07
		pmb0623	Chrysoeriol-6-C-glucoside-7-O-glucoside	0.504795	-0.98623			normal	624.169	C28H32O16	[M+H]+	106913	92671.8	137859	215811	206578	246086
		MWSslk237	Hispidulin-7-O-glucoside(Homoplantaginin)	3.78015	1.91844	1.35865	0.00027172	up	462.116	C22H22O11	[M+H]+	2.02443e+06	1.73944e+06	1.83827e+06	517903	361581	602505
		MWSHY0008	Apigenin-6-C-glucoside (Isovitexin)	0.628708	-0.669538			normal	432.106	C21H20O10	[M+H]+	941554	894821	661241	988588	1.30163e+06	1.6824e+06
		Xmyn008071	Gnetifolin B	9.73407	3.28304	1.29522	0.0217534	up	300.063	C16H12O6	[M-H]-	92147.1	53963.4	75226.6	8510.55	2568.4	11659.4
		pmb3042	Tricin-5-O-Glucoside	0.532547	-0.90902			normal	492.127	C23H24O12	[M-H]-	54058.2	64603	79514	122009	113690	136428
		Zmhp003514	6,7,8-Tetrahydroxy-5-methoxyflavone	1.69041	0.757373			normal	300.063	C16H12O6	[M+H]+	17118.8	28887	140148	38991.6	12370.4	58761.6
		pmb3002	Chrysoeriol-7-O-rutinoside	2.19463	1.13398	1.11795	0.0710313	up	608.174	C28H32O15	[M-H]-	226976	119645	196779	51052.6	109579	86972.5
		Lmsp002330	Alcesefoliside	0.132374	-2.91731	1.24525	0.161146	down	756.211	C33H40O20	[M+H]+	497764	351545	440700	2.94123e+06	5.62739e+06	1.17659e+06
		pmp000001	Hispidulin (5,7,4'-Trihydroxy-6-methoxyflavone)	1.46684	0.552715			normal	300.063	C16H12O6	[M+H]+	30746.8	25224.2	140159	33778.9	28646.6	71283.7
		Zmjp004852	5,6,3',4'-Tetrahydroxy-3,7-dimethoxyflavone-6-O-glucoside	0.975899	-0.0351965			normal	508.122	C23H24O13	[M+H]+	105734	190924	171790	94347.2	199392	186277
		pmp001079	Luteolin-7-O-neohesperidoside (Lonicerin)	1.10515	0.144237			normal	594.159	C27H30O15	[M+H]+	3.59127e+06	3.88068e+06	3.59036e+06	2.47234e+06	1.78898e+06	5.74848e+06
		Hmmp004965	Diosmetin-7-O-glucoside	3.69322	1.88488	1.31066	0.00721835	up	462.116	C22H22O11	[M+H]+	1.89529e+06	1.39867e+06	1.98303e+06	429503	320179	679150
		Lmnp002616	Cirsiliol-8-C-(2''-glucosyl)glucoside	0.863704	-0.211392			normal	654.18	C29H34O17	[M+H]+	221704	174532	123259	248344	170117	183012
		pmb2987	Acacetin-7-O-(6''-O-acetyl)glucoside	0.676242	-0.564389			normal	488.132	C24H24O11	[M-H]-	872219	1.0985e+06	747805	1.00022e+06	1.94698e+06	1.07284e+06
		Hmpp003270	Luteolin-4'-O-glucoside	1.53328	0.616621			normal	448.101	C21H20O11	[M+H]+	6.70864e+07	5.6127e+07	4.96251e+07	2.9654e+07	3.53684e+07	4.77024e+07
		Zmhp003607	Sachaloside IV	0.019012	-5.71695	1.38496	0.00858649	down	772.206	C33H40O21	[M+H]+	913209	704902	422903	2.9201e+07	3.91746e+07	3.89784e+07
		pmb3041	Tricin-7-O-saccharic acid	2.52947	1.33884	1.26749	0.0718688	up	522.101	C23H22O14	[M-H]-	197574	157323	288690	69815.2	82500.4	102120
		MWS20150	Luteolin-7-O-glucoside (Cynaroside)	1.16247	0.217193			normal	448.101	C21H20O11	[M+H]+	132619261	1.07705e+08	8.97019e+07	6.84393e+07	7.36027e+07	1.41859e+08
		pmp000237	Apigenin-6-C-(2''-glucuronyl)xyloside	0.639734	-0.644456			normal	578.127	C26H26O15	[M+H]+	651821	857359	615512	987869	1.03248e+06	1.30086e+06
		pmp001106	Vitexin-2''-O-glucoside	0.729909	-0.454211			normal	594.159	C27H30O15	[M+H]+	468640	523174	577275	716942	526543	906218
		pmb3012	Chrysoeriol-7-O-glucoside	3.8816	1.95665	1.36947	0.000291978	up	462.116	C22H22O11	[M-H]-	386579	448063	429620	83115.2	121698	120894
		mws1661	Diosmetin-7-O-rutinoside (Diosmin)	2.54836	1.34957	1.24405	0.0953336	up	608.174	C28H32O15	[M+H]+	383502	256040	187685	108662	126487	89461.9
		Hmgp002036	Nepetin-7-O-glucoside(Nepitrin)	3.07781	1.6219			normal	478.111	C22H22O12	[M+H]+	1.2182e+06	652760	1.93669e+06	476366	76481.7	684283
		Hmgp002238	Jaceosidin-7-O-Glucoside	1.48152	0.567077			normal	492.127	C23H24O12	[M+H]+	119095	108244	166698	72902.7	94382.6	98682.4
		pmp000585	Apigenin-7-O-(6''-malonyl)glucoside	1.23609	0.305782			normal	518.106	C24H22O13	[M+H]+	48413.5	21688.8	19576.9	33187.8	3807.69	35555.3
		Zmgp004060	paratensein-7-O-glucoside	3.50345	1.80878	1.33957	0.000506884	up	462.116	C22H22O11	[M+H]+	1.74034e+06	1.49962e+06	1.73189e+06	463782	333345	622002
		Hmqp003184	Luteolin-7-O-(6''-malonyl)glucoside-5-O-arabinoside	0.330052	-1.59923	1.36404	0.00036668	down	666.143	C29H30O18	[M+H]+	829972	1.07929e+06	721764	2.52466e+06	2.75628e+06	2.69061e+06
		pme0368	Apigenin-7-O-rutinoside (Isorhoifolin)	0.631226	-0.663771			normal	578.164	C27H30O14	[M+H]+	969548	853407	780424	1.07734e+06	1.58677e+06	1.4602e+06
		MWSslk146	4'-O-Glucosylvitexin	1.27224	0.347376			normal	594.159	C27H30O15	[M+H]+	2.78172e+06	2.5582e+06	2.2604e+06	1.6403e+06	2.93397e+06	1.39968e+06
		MWSHY0189	Apigenin-7-O-glucoside(Cosmosiin)	0.559629	-0.837458			normal	432.106	C21H20O10	[M+H]+	2.56873e+07	1.80478e+07	1.83051e+07	3.37273e+07	3.95991e+07	3.7533e+07
		Hmlp003068	Meratin	0.92968	-0.105194			normal	626.148	C27H30O17	[M+H]+	344467	185693	250000	307894	278405	252870
		Lmgp004784	Apiferol	1.8909	0.919071			normal	274.084	C15H14O5	[M+H]+	96470.9	92149	46695.9	59818.4	36806.7	27821.6
		pmb0674	Apigenin-8-C-arabinoside-7-O-(6''-salicyloyl)glucoside	0.474716	-1.07486	1.15396	0.0988814	down	684.169	C33H32O16	[M+H]+	89194.5	88157.2	62830.4	105253	199252	201444
		Smlp011494	Amentoflavone-4',4''',7,7''-tetramethyl ether	1.50604	0.590758			normal	594.153	C34H26O10	[M+H]+	7.41729e+06	1.05684e+07	5.15786e+06	2.48263e+06	6.75536e+06	6.12919e+06
		Lmtp004722	Mearnsetin	0.230048	-2.11999	1.1206	0.1103	down	332.053	C16H12O8	[M+H]+	28622.4	13755.9	56946.9	191529	59414.7	180815
		pmp000575	Acacetin-7-O-glucoside (Tilianin)	1.29129	0.368808			normal	446.121	C22H22O10	[M+H]+	109394	83343.3	82478.9	51155.6	66993.1	94984.8
		Lmjp003655	6-C-MethylKaempferol-3-glucoside	1.35948	0.443058			normal	462.116	C22H22O11	[M+H]+	165446	157787	200325	29516.3	219317	136282
		mws0072	Apigenin-5-O-glucoside	0.146115	-2.77482	1.27908	0.174505	down	432.106	C21H20O10	[M+H]+	5.87882e+06	5.48079e+06	4.65566e+06	1.97357e+07	2.32296e+07	6.6642e+07
		Lmtn002997	Mearnsetin-3-O-glucoside	0.781448	-0.355778			normal	494.106	C22H22O13	[M-H]-	149435	186449	217524	216210	243364	248609
		MWSHY0016	Luteolin-6-C-glucoside (Isoorientin)	1.97499	0.981847			normal	448.101	C21H20O11	[M+H]+	114762	167484	50942	66880.1	83523.6	18299.6
		pmb0639	Apigenin-8-C-glucoside-7-O-Sophoroside	0.177669	-2.49274	1.32133	0.0393785	down	756.211	C33H40O20	[M+H]+	209111	104505	101415	557390	733877	1.04471e+06
		mws0058	Diosmetin (5,7,3'-Trihydroxy-4'-methoxyflavone)	4.43674	2.1495	1.35123	0.0373534	up	300.063	C16H12O6	[M-H]-	113484	67321.6	79264.1	21855.4	21364.4	15397.4
		Smhp004476	Isovitexin-2''-O-xyloside	0.109342	-3.19308	1.34879	0.00549923	down	564.148	C26H28O14	[M+H]+	197625	475251	200509	2.31369e+06	3.14302e+06	2.53094e+06
		mws0047	Apigenin-7-O-neohesperidoside (Rhoifolin)	1.29938	0.377827			normal	578.164	C27H30O14	[M+H]+	439934	360708	314704	309653	175397	373316
		MWSHY0040	Oroxin A	1.32762	0.40884			normal	432.106	C21H20O10	[M+H]+	838461	629530	461499	253504	514483	685360
		Lmnp003080	Hispidulin-8-C-(2''-O-xylosyl)xyloside	0.537283	-0.896245			normal	564.148	C26H28O14	[M+H]+	8577.31	3909.25	38940.5	9971.08	66148.2	19597.7
		Zmjp003179	Orientin-2''-O-xyloside	0.216984	-2.20434	1.20458	0.0479344	down	580.143	C26H28O15	[M+H]+	67959.9	18765.4	17944.7	163685	100133	218569
		mws1299	Luteolin-8-C-glucoside (Orientin)	1.16244	0.217156			normal	448.101	C21H20O11	[M+H]+	102128	54485.9	100351	96726.9	23211.6	101118
		Hmgp001902	Pectolinarigenin-7-O-glucoside	0.369546	-1.43618	1.17681	0.0811774	down	476.132	C23H24O11	[M+H]+	160722	75476.6	155156	494390	243653	320974
		MWS20151	Apigenin; 4',5,7-Trihydroxyflavone	0.554187	-0.851555			normal	270.053	C15H10O5	[M+H]+	22177.9	35236.9	20154.3	37438.2	54062.3	48468.6
		Hmzp003994	Pedaliin	1.42499	0.510953			normal	478.111	C22H22O12	[M+H]+	224351	120009	195647	148101	86608.9	144245
		Zmhn003257	5,7,2'-Trhiyroxy-8-methoxyflavone	6.39821	2.67767	1.37193	0.0343169	up	300.063	C16H12O6	[M-H]-	120223	76011	76173.1	15970.4	14432.1	12173.1
		Hmgp002148	Nepetin-7-O-alloside	54901.7	15.7446	1.39503	0.0205385	up	478.111	C22H22O12	[M+H]+	636711	439226	406409	9	9	9
		Zmjp003031	Orientin-2''-O-galactoside	0.130458	-2.93834	1.36489	0.0428579	down	610.153	C27H30O16	[M+H]+	272134	195640	286653	1.45894e+06	2.63978e+06	1.68417e+06
		Lmyp004081	Isovitexin-2''-O-rhamnoside	0.409212	-1.28908	1.3464	0.0184596	down	578.164	C27H30O14	[M+H]+	250647	194407	221036	536425	454991	636320
		pmn001702	Tetahydroxyflavone-7-O-glucuronide	3666.68	11.8403	1.39519	0.00700726	up	462.08	C21H18O12	[M-H]-	38461.4	29400.8	31138.3	9	9	9
		pmp000573	Acacetin-7-O-galactoside	1.25458	0.327202			normal	446.121	C22H22O10	[M+H]+	302749	123293	170016	133782	189367	151957
		Zmjp003291	Vitexin-2''-O-galactoside	1.43599	0.522047			normal	594.159	C27H30O15	[M+H]+	2.80661e+06	2.61618e+06	2.60738e+06	1.3903e+06	2.74068e+06	1.46109e+06
		Lmtp002474	Apigenin-6-C-(2''-glucosyl)arabinoside	1.16612	0.221721			normal	564.148	C26H28O14	[M+H]+	50957.9	33150.5	20272.9	36237.4	42193.8	11080.1
		pmb0592	Chrysoeriol-7-O-rutinoside-5-O-glucoside	1.13346	0.180737			normal	770.227	C34H42O20	[M+H]+	112074	9528.46	17679.1	47943.1	28778.2	46160.1
		pmb0691	Isoorientin-7-O-(2''-rhamnosyl)glucoside	0.264621	-1.918	1.12929	0.151417	down	756.211	C33H40O20	[M+H]+	54815.6	31341	40533.9	62101.4	175934	240727
		Zmxp003107	Luteolin-7,3'-di-O-glucoside	0.264063	-1.92105			normal	610.153	C27H30O16	[M+H]+	2.09856e+06	714498	767271	1.0038e+06	4.08381e+06	8.47101e+06
		Lmpp003930	Apigenin-7-O-(6''-p-Coumaryl)glucoside	0.925201	-0.112162			normal	578.142	C30H26O12	[M+H]+	163062	211546	213733	189871	167481	278554
		pme3227	Vitexin-2''-O-rhamnoside	0.564278	-0.825521			normal	578.164	C27H30O14	[M+H]+	152113	99405.7	189672	277511	310539	193817
		Cmyp002064	Yuanhuanin	3.81816	1.93288	1.26289	0.01407	up	462.116	C22H22O11	[M+H]+	1948566	1.23539e+06	1.67851e+06	219219	451285	603006
		pme1665	Isovitexin-7-O-glucoside(Saponarin)	5.48639	2.45586	1.19813	0.0083252	up	594.159	C27H30O15	[M-H]-	38626	55406.3	58408.5	2372.96	11227.5	14184.9
		Hmcn001884	6-Hydroxyluteolin 5-glucoside	4.13454	2.04773	1.28431	0.00476518	up	464.096	C21H20O12	[M-H]-	4.26229e+07	3.02644e+07	3.83497e+07	4.67374e+06	9.32543e+06	1.29051e+07
		Hmpp002612	Luteolin-7-O-gentiobioside	0.223051	-2.16455			normal	610.153	C27H30O16	[M+H]+	1.84084e+06	568723	553793	1.04027e+06	4.87658e+06	7.36868e+06
		mws0048	Apigenin-8-C-Glucoside (Vitexin)	0.857206	-0.222287			normal	432.106	C21H20O10	[M-H]-	159466	151294	107756	78618.7	313689	95925.6
		Hagn003556	7-Benzyloxy-5-hydroxy-3',4'-methylenedioxyflavonoid	0.360924	-1.47023	1.01254	0.175222	down	388.095	C23H16O6	[M-H]-	1.8331e+06	1.31705e+06	1.26581e+06	4.89565e+06	1.57872e+06	5.76079e+06
		pmb0713	Tricin-7-O-(2''-O-glucosyl)glucoside	1.11011	0.150702			normal	654.18	C29H34O17	[M+H]+	40008.8	71545.8	35426.9	46585	54640.2	31177.5
		Lmtp002942	Apigenin-6,8-di-C-arabinoside	1.09397	0.129571			normal	534.137	C25H26O13	[M+H]+	109711	145045	69602.8	85990.4	105588	104920
		Lmtp002822	Apigenin-6-C-arabinoside-8-C-xyloside	1.09397	0.129571			normal	534.137	C25H26O13	[M+H]+	109711	145045	69602.8	85990.4	105588	104920
		Lmnp202580	Apigenin-8-C-(2''-xylosyl)glucoside	0.131639	-2.92534	1.38885	0.0109095	down	564.148	C26H28O14	[M+H]+	476179	493191	436238	3.4375e+06	4.17814e+06	3.06207e+06
		Lmlp005572	Galangin-7-O-glucoside	0.603348	-0.728938			normal	432.106	C21H20O10	[M+H]+	2.01683e+07	1.46657e+07	1.15964e+07	1.6919e+07	2.91481e+07	3.08876e+07
		pmb2999	Chrysoeriol-5-O-glucoside	3.16185	1.66077	1.3546	0.0152406	up	462.116	C22H22O11	[M-H]-	7.19515e+06	5.56453e+06	7.91895e+06	1.81975e+06	2.20019e+06	2.52009e+06
		pmp000587	Luteolin-7-O-(6''-malonyl)glucoside	12.2462	3.61426	1.36199	0.00586969	up	534.101	C24H22O14	[M+H]+	103451	81619.4	81232.9	3937.92	9522.5	8285.31
		Zmjp003463	Vitexin-2''-O-xyloside	0.129806	-2.94557	1.3659	0.0519801	down	564.148	C26H28O14	[M+H]+	321892	375527	285404	2.0744e+06	3.56664e+06	1.93044e+06
		Lmsp004632	Scutellarein (5,6,7,4'-Tetrahydroxyflavone)	0.265632	-1.9125	1.28397	0.013888	down	286.048	C15H10O6	[M+H]+	103571	62088.3	152204	298862	442062	455706
		pmp001080	Diosmetin-7-O-Neohesperidoside (Neodiosmin)	2.15836	1.10994			normal	608.174	C28H32O15	[M+H]+	51660.8	9	59128	4050.66	35043.2	12240.3
		Hmgp002121	Hispidulin-7-O-(6''-O-p-Coumaroyl)Glucoside	2.04116	1.02939	1.19592	0.0189293	up	608.153	C31H28O13	[M+H]+	113941	85573.8	85531.3	55298.7	54438.7	29911.6
		Lmgp004152	Diosmetin-8-C-(2''-O-arabinosyl)glucoside	0.21088	-2.2455	1.21018	0.0932567	down	594.159	C27H30O15	[M+H]+	11078.8	6395.61	21526.8	91487.5	60264.4	33192.8
		pmb0665	Orientin-7-O-glucoside	2.16591	1.11497	1.14258	0.0378042	up	610.153	C27H30O16	[M+H]+	5.10241e+07	3.78556e+07	3.78055e+07	15525392	1.21777e+07	3.07875e+07
		pmb0608	Chrysoeriol-7-O-(6''-malonyl)glucoside	0.70462	-0.505082			normal	548.117	C25H24O14	[M+H]+	23523.4	24442.9	25816.2	27659.3	19571.9	57481.2
		pmb0681	Apigenin-8-C-Arabinoside	1.068	0.0949108			normal	402.095	C20H18O9	[M+H]+	62340.4	50960.7	7196	22872.4	41980.8	47971.9
		Hmdp103165	Clitorin	0.952739	-0.0698473			normal	740.216	C33H40O19	[M+H]+	40336.5	133900	44153.8	52102.1	129809	47313.3
		Hmmp002073	Apigenin-7-O-rutinoside-4'-O-Sophoroside	1.29672	0.374865			normal	902.269	C39H50O24	[M+H]+	9	41660.2	42084.1	20268.6	25773.9	18546.2
		pmp000236	Isovitexin-8-O-xyloside	1.04488	0.0633431			normal	564.148	C26H28O14	[M+H]+	46374.4	47784.1	33323.8	36715.8	34876.8	50413.5
		mws1073	Apigenin-6,8-di-C-glucoside (Vicenin-2)	1.01786	0.0255347			normal	594.159	C27H30O15	[M+H]+	2.09708e+06	2.00725e+06	1.25904e+06	1.3686e+06	1.87404e+06	2.02664e+06
		pmp000006	Eupatilin (5,7-Dihydroxy-3',4',6-Trimethoxyflavone)	1.38311	0.467916			normal	344.09	C18H16O7	[M+H]+	30334	36528.2	48102.9	72800.5	5220.1	5100.13
		pmp000786	Eupatorin; 3',5-Dihydroxy-4',6,7-Trimethoxyflavone	1.38311	0.467916			normal	344.09	C18H16O7	[M+H]+	30334	36528.2	48102.9	72800.5	5220.1	5100.13
		pmp000583	Diosmetin-7-O-glucuronide	1.32192	0.40263			normal	476.096	C22H20O12	[M+H]+	65826.4	2114.35	29815.3	37025.6	20459.5	16465.2
		Hmmp002169	Luteolin-5,7-di-O-rutinoside	1.02913	0.0414254			normal	902.269	C39H50O24	[M+H]+	41033.7	37958.2	22561.5	66246.3	32423.6	9
		pmb0566	Luteolin-7-O-glucoside-5-O-arabinoside	1.83731	0.877598			normal	580.143	C26H28O15	[M+H]+	48470.6	8436.92	42020	13557.8	11348.5	28937.3
Flavanones	34
		MWS20145	Eriodictyol-7-O-glucoside	3.27812	1.71287	1.36804	0.00016628	up	450.116	C21H22O11	[M+H]+	1.20926e+06	1.11103e+06	1.24349e+06	318170	450672	318298
		pme1598	Hesperetin-5-O-glucoside	3.16232	1.66098	1.3064	0.0557156	up	464.132	C22H24O11	[M-H]-	3.49795e+07	4.02239e+07	6.14482e+07	1.0964e+07	1.59104e+07	1.63381e+07
		Jmgn004021	6-C-Glucosyl-2-Hydroxynaringenin	0.642587	-0.638035			normal	450.116	C21H22O11	[M-H]-	1.54552e+07	1.71553e+07	1.3038e+07	23300358	3.03091e+07	1.7429e+07
		pme3475	Butin; 7,3',4'-Trihydroxyflavanone	4.78803	2.25943	1.3298	0.0208044	up	272.068	C15H12O5	[M+H]+	1.99048e+06	1.22144e+06	1.56493e+06	482908	268175	246581
		pmb2979	Hesperetin-7-O-(6''-malonyl)glucoside	1.50856	0.593168			normal	550.132	C25H26O14	[M-H]-	110381	77721.5	96322.1	61439.1	56445.9	70656.1
		MWSHY0116	Hesperetin-7-O-rutinoside (Hesperidin)	1.95382	0.966295			normal	610.19	C28H34O15	[M+H]+	2.13556e+06	2.61753e+06	2.89391e+06	1.06297e+06	1.07364e+06	1.77727e+06
		pme1611	Isohemiphloin	0.381067	-1.39189			normal	434.121	C21H22O10	[M-H]-	56172.9	118480	127342	116187	28354.7	647959
		HJN086	Eriodictyol-3'-O-glucoside	3.73322	1.90042	1.30738	0.0157113	up	450.116	C21H22O11	[M-H]-	5.29903e+06	3.80397e+06	5.91694e+06	1.853e+06	1.28652e+06	883804
		mws0064	Eriodictyol (5,7,3',4'-Tetrahydroxyflavanone)	14.036	3.81106	1.36363	0.00768891	up	288.063	C15H12O6	[M-H]-	709758	555481	759482	66622.6	51528.5	26100.9
		HJN087	Naringenin-4'-O-glucoside	2.64914	1.40553	1.24986	0.0779286	up	434.121	C21H22O10	[M-H]-	1.34013e+06	715279	851500	416115	267068	414120
		pmb2970	Hesperetin-5,7-di-O-glucoside	2.21411	1.14673	1.27526	0.0050448	up	626.185	C28H34O16	[M-H]-	30308.9	30707.1	24476.9	14387.1	9022.03	15203.5
		Lmdp004307	Farrerol-7-O-glucoside	5.23267	2.38755	1.27229	0.0914953	up	462.153	C23H26O10	[M+H]+	311525	213592	113930	53370.3	43201.1	25555
		Lmzp002365	Hesperetin-7-O-glucoside	1.16361	0.21861			normal	464.132	C22H24O11	[M+H]+	2.01424e+07	1.70428e+07	2.17981e+07	1.65399e+07	1.66905e+07	1.74594e+07
		Hmmn002588	Eriodictyol-7-O-(2''-O-rhamnosyl)xyloside-4'-O-glucuronide	0.887116	-0.172806			normal	742.196	C32H38O20	[M-H]-	24885.8	20755	28961	20343.5	31739.8	32011.4
		MWSHY0137	Naringenin (5,7,4'-Trihydroxyflavanone)	4.37838	2.1304	1.29871	0.0137069	up	272.068	C15H12O5	[M+H]+	1.72064e+06	1.09001e+06	1.37444e+06	502463	248974	204415
		HJN090	Butin-7-O-glucoside	2.70567	1.43599	1.2897	0.0369262	up	434.121	C21H22O10	[M-H]-	1.2561e+06	762329	1.15453e+06	458325	295416	418964
		MWSHY0019	Hesperetin-7-O-neohesperidoside(Neohesperidin)	183222	17.4832	1.38864	0.190977	up	610.19	C28H34O15	[M+H]+	3.27547e+06	1.24667e+06	424839	9	9	9
		mws0046	Naringenin-7-O-Neohesperidoside(Naringin)	0.960327	-0.0584028			normal	580.179	C27H32O14	[M-H]-	6395.31	8194.66	14343.2	6888.52	17504.3	5735.7
		mws1179	Naringenin-7-O-glucoside (Prunin)	0.939245	-0.0904265			normal	434.121	C21H22O10	[M-H]-	1.06363e+06	804026	1.01343e+06	1.23714e+06	934252	896049
		Cmxp004977	Isookanin	16.4197	4.03736	1.36408	0.00196465	up	288.063	C15H12O6	[M+H]+	641742	533296	640899	58936.2	31176.1	20482.6
		pmb3023	Eriodictyol-8-C-glucoside	1.08877	0.1227			normal	450.116	C21H22O11	[M-H]-	1.03667e+06	941393	958271	498318	936395	1.26221e+06
		MWSHY0092	Eriodictyol-7-O-Rutinoside (Eriocitrin)	1.18236	0.241668			normal	596.174	C27H32O15	[M+H]+	8.47373e+06	6.80851e+06	6.8145e+06	2.88587e+06	5.12204e+06	1.06808e+07
		MWSHY0089	5,4'-Dihydroxy-7-methoxyflavanone (Sakuranetin)	1.5739	0.654348			normal	286.084	C16H14O5	[M+H]+	19348.2	30156.3	25383.3	18802.7	12767	16011.2
		pmb0628	Eriodictyol-8-C-glucoside-4'-O-glucoside	5.74254	2.52169	1.3526	0.0078305	up	612.169	C27H32O16	[M+H]+	1.28548e+06	937685	1.02937e+06	238418	206981	120996
		Zmhn001036	Choerospondin	0.83346	-0.262815			normal	434.121	C21H22O10	[M-H]-	357521	220006	237934	243373	256719	478312
		pma0791	Naringenin-7-O-(6''-malonyl)glucoside	3.09142	1.62827	1.20075	0.100151	up	520.122	C24H24O13	[M+H]+	824649	397778	992805	308262	229782	178531
		HJAP135	Pinocembrin-7-O-(6''-O-malonyl)glucoside	9.33617	3.22283	1.37792	0.0203448	up	504.127	C24H24O12	[M+H]+	235776	149242	184879	18505.1	17195.6	25341.2
		MWSHY0124	Pinocembrin (Dihydrochrysin)	13.2699	3.73009	1.31692	0.0629639	up	256.074	C15H12O4	[M+H]+	88920.3	39782.3	102094	2714.92	5570.98	9106.56
		HJN078	Pinocembrin-7-O-(2''-O-arabinosyl)glucoside	2.04077	1.02911	1.32689	0.0244568	up	550.169	C26H30O13	[M-H]-	92809.5	98155.5	71184	38737.7	42269.4	47449.2
		Lmzn001875	Naringenin-7-O-Rutinoside-4'-O-glucoside	0.452354	-1.14448			normal	742.232	C33H42O19	[M-H]-	4071.32	2621.17	16582.6	11830.1	22437.6	17185.6
		Lmyn004037	Eriodictyol-7-O-(6''-O-galloyl)glucoside	2149.68	11.0699	1.38239	0.133898	up	602.127	C28H26O15	[M-H]-	33105.1	19168.1	5768.27	9	9	9
		pmb2975	Hesperetin-3'-O-glucuronide	1.3873	0.472283			normal	478.147	C23H26O11	[M-H]-	42897.6	13010.3	17210.6	16752.2	15401.1	20552.2
		MWSHY0056	Naringenin-7-O-Rutinoside(Narirutin)	0.314468	-1.66901			normal	580.179	C27H32O14	[M+H]+	349696	273798	353593	1.06135e+06	1.71052e+06	335242
		pma0724	Naringenin-6-C-Glucoside	0.699687	-0.515219			normal	434.121	C21H22O10	[M+H]+	80136.7	77798.3	163404	134734	116985	207542
Flavanols	25
		Smgp005565	Cinchonain Ia	0.470074	-1.08904	1.30637	0.00465338	down	452.111	C24H20O9	[M+H]+	1.27365e+06	993461	784669	2.05902e+06	2.10297e+06	2.33013e+06
		Smgp105565	Cinchonain Ib	0.470074	-1.08904	1.30637	0.00465338	down	452.111	C24H20O9	[M+H]+	1.27365e+06	993461	784669	2.05902e+06	2.10297e+06	2.33013e+06
		MWSHY0203	Catechin	0.475817	-1.07152	1.3687	0.00191628	down	290.079	C15H14O6	[M+H]+	478452	436588	533234	964026	967923	1.11182e+06
		Lmmp003672	8,8'-Methylenebiscatechin	0.189456	-2.40006	1.38415	0.00594242	down	592.158	C31H28O12	[M+H]+	48714	43098.2	37455	236388	249829	196090
		MWSHY0098	Epigallocatechin	20.6756	4.36986	1.3685	0.00501934	up	306.074	C15H14O7	[M+H]+	1.43269e+06	1.11995e+06	1.41989e+06	39814.7	105318	47003
		pmn001417	Cinchonain Ic	0.434439	-1.20277	1.17149	0.0360585	down	452.111	C24H20O9	[M-H]-	7.36757e+06	4.19636e+06	3.1222e+06	9.17985e+06	1.03008e+07	1.43241e+07
		Zajn002491	Catechin-4-β-D-galactopyranoside	0.48115	-1.05544	1.31264	0.00280731	down	452.132	C21H24O11	[M-H]-	234248	171483	263128	424476	481531	484120
		pmb2947	Catechin-catechin-catechin	0.690743	-0.533778			normal	866.206	C45H38O18	[M-H]-	6.27986e+06	4.21616e+06	5.92535e+06	7.55683e+06	7.49948e+06	8.71717e+06
		pmb3114	Epicatechin-epiafzelechin	0.523769	-0.932997			normal	562.148	C30H26O11	[M-H]-	230231	182688	215383	276305	399137	524136
		Zmdn002400	Epicatechin-3'-O-β-D-glucopyranoside	0.407516	-1.29507	1.35905	0.00378005	down	452.132	C21H24O11	[M-H]-	206521	158527	225437	481378	490070	477538
		mws1422	Epiafzelechin	6.04251	2.59515	1.29319	0.000757052	up	274.084	C15H14O5	[M+H]+	112183	127489	133530	9574.48	36628	15560.3
		HJN069	Tetrahydroxyflavan-(4α-8-epicatechin)	0.59724	-0.743618			normal	576.127	C30H24O12	[M-H]-	195275	168167	256000	275223	266645	495307
		mws0355	Catechin gallate	1.04116	0.0581952			normal	442.09	C22H18O10	[M-H]-	210728	225343	265644	185947	249046	238980
		pmn001415	Catechin-(7,8-bc)-4β-(3,4-dihydroxyphenyl)-dihydro-2-(3H)-one	0.395281	-1.33905	1.19728	0.0561169	down	452.111	C24H20O9	[M-H]-	3.72925e+06	1.86897e+06	1.85813e+06	5.4564e+06	4.9031e+06	8.50391e+06
		Cmjp003100	Leucocyanidin	83.7116	6.38735	1.36076	0.0122487	up	306.074	C15H14O7	[M+H]+	2.45367e+06	1.8304e+06	2.69635e+06	32333.2	42956	8097.48
		Lmhn004030	5,7,3',4',5'-Pentahydroxyflavan (Tricetiflavan)	0.49685	-1.00912	1.31239	0.0239431	down	290.079	C15H14O6	[M-H]-	5.962e+06	4.85174e+06	6.30179e+06	9.60948e+06	1.13428e+07	1.34958e+07
		pmn001418	Cinchonain Id	0.487045	-1.03787	1.27104	0.00900484	down	452.111	C24H20O9	[M-H]-	5.11949e+06	3.22114e+06	3.29741e+06	7.26595e+06	7.47936e+06	9.14989e+06
		Lmmp000897	Gallocatechin-(4α→8)-gallocatechin	0.408871	-1.29028	1.25129	0.00520729	down	610.132	C30H26O14	[M+H]+	453452	244824	499037	1.08349e+06	966868	877982
		MWSHY0094	Gallocatechin gallate	3.93664	1.97697			normal	458.085	C22H18O11	[M+H]+	21035	46961.1	10294.7	9	4788.12	15090.6
		mws2220	Gallocatechin 3-O-gallate	3.30789	1.72591			normal	458.085	C22H18O11	[M-H]-	35994.5	104534	5392.67	15547.4	19393	9172.9
		Lmgp004167	3',4,4',5,7-Pentahydroxyflavan (Luteoforol)	0.457789	-1.12724	1.09009	0.157235	down	290.079	C15H14O6	[M+H]+	595961	1.04247e+06	1.02871e+06	1.59549e+06	1.31793e+06	2.91271e+06
		pmn001416	Catechin-(7,8-bc)-4α-(3,4-dihydroxyphenyl)-dihydro-2-(3H)-one	0.429445	-1.21945	1.25718	0.0959664	down	452.111	C24H20O9	[M-H]-	4.6409e+06	3.63506e+06	3.81891e+06	7.64883e+06	7.46287e+06	1.30523e+07
		HJN041	Epicatechin glucoside	1.68773	0.755087			normal	452.132	C21H24O11	[M-H]-	734454	521784	1.0593e+06	418703	523812	429467
		mws1397	Epicatechin gallate	1.08247	0.114322			normal	442.09	C22H18O10	[M-H]-	225477	258079	327639	231160	274013	244222
		mws0034	Epigallocatechin-3-gallate	4.83127	2.2724	1.00916	0.204372	up	458.085	C22H18O11	[M-H]-	49428.4	79164.3	10626.4	7211.44	10025	11579.8
Flavanonols	11
		mws0044	Taxifolin(Dihydroquercetin)	11.8706	3.56932	1.37531	1.49008e-05	up	304.058	C15H12O7	[M-H]-	1.39086e+07	1.30119e+07	1.29742e+07	1.34986e+06	1.31499e+06	695962
		mws1094	Aromadendrin (Dihydrokaempferol)	11.2479	3.49159	1.3522	0.0426283	up	288.063	C15H12O6	[M-H]-	179930	100588	207141	18333.8	15962.9	9058.74
		MWStz191	Taxifolin-3'-O-glucoside	1.12475	0.169601			normal	466.111	C21H22O12	[M+H]+	212094	228601	226674	212538	169015	211797
		Lmlp005236	Dihydrokaempferol-3-O-glucoside	0.885896	-0.174791			normal	450.116	C21H22O11	[M+H]+	9	2.60866e+06	6.1225e+06	1.99162e+06	2.49252e+06	5.37162e+06
		Lmmn004625	Dihydrokaempferol-7-O-glucoside	3.34447	1.74178	1.26405	0.0133608	up	450.116	C21H22O11	[M-H]-	3.59561e+06	2.56501e+06	3.98719e+06	1.56758e+06	818376	648252
		mws1361	Taxifolin-3-O-rhamnoside (Astilbin)	1.2188	0.285461			normal	450.116	C21H22O11	[M-H]-	19169.9	13537.3	16756.2	15383.6	9389.66	15810.5
		mws0744	Dihydromyricetin (Ampelopsin)	1.08177	0.113389			normal	320.053	C15H12O8	[M-H]-	62118	35598.7	57963.4	36027.4	48054	59831.5
		Lmzp003012	3-Hydroxy-4',5,7-Trimethoxyflavanone	0.593377	-0.75298			normal	330.11	C18H18O6	[M+H]+	56864.3	24637.6	79696.5	92850.2	91382.3	87430.4
		Lmtn002796	Aromadendrin-7-O-glucoside	1.58618	0.665553			normal	450.116	C21H22O11	[M-H]-	2.94323e+06	2.47191e+06	4.88294e+06	1.18261e+06	2.26971e+06	3.04007e+06
		MWSHY0130	Taxifolin-7-O-rhamnoside	1.08717	0.120575			normal	450.116	C21H22O11	[M+H]+	138298	67576.5	155551	93502.4	122575	116369
		mws1360	Engeletin	4.06406	2.02292	1.28751	0.0249057	up	434.121	C21H22O10	[M-H]-	132808	80322.5	92830.3	17806.6	18003.9	39473.8
Isoflavones	14
		MWSHY0063	Sophoricoside	0.597889	-0.742051			normal	432.106	C21H20O10	[M+H]+	1.84306e+07	1.52586e+07	1.24908e+07	2.33171e+07	2.55199e+07	2.84015e+07
		mws0895	Genistein-7-O-Glucoside (Genistin)	0.254324	-1.97526	1.35798	0.00714466	down	432.106	C21H20O10	[M-H]-	1.30747e+06	846934	897461	3.38729e+06	3.97657e+06	4.63609e+06
		mws0918	Prunetin (5,4'-Dihydroxy-7-methoxyisoflavone)	1.14792	0.199023			normal	284.068	C16H12O5	[M-H]-	88410.5	49446.5	46694.5	55254.9	54376.4	51139
		Lmgp003546	4',5'-Dihydroxy-6,8-dimethoxyisoflavone-7-O-galactoside	1.48873	0.57408			normal	492.127	C23H24O12	[M+H]+	122922	127262	153205	71777.1	100329	98856.9
		pmp000411	Genistein-8-C-apiosyl(1→6)glucoside	0.213861	-2.22526	1.3154	0.0272507	down	564.148	C26H28O14	[M+H]+	503391	299198	640470	2.73822e+06	1.59577e+06	2.41367e+06
		pmp000415	3'-Methoxydaidzin	12.9442	3.69424	1.33356	0.00285827	up	446.121	C22H22O10	[M+H]+	229858	211638	269595	20114.5	27731.1	7089.39
		pme3261	6-Hydroxydaidzein	0.350083	-1.51423	1.29066	0.0781155	down	270.053	C15H10O5	[M+H]+	830439	666884	617382	1.47218e+06	2.79167e+06	1.77674e+06
		Lmgp003335	4',5-Dihydroxyisoflavone-7-O-galactoside	0.705096	-0.504108			normal	432.106	C21H20O10	[M+H]+	2.344e+07	1.62065e+07	1.23655e+07	1.85969e+07	3.05813e+07	2.45876e+07
		pme3400	Biochanin A-7-O-glucoside (Sissotrin)	1.33084	0.412337			normal	446.121	C22H22O10	[M+H]+	277360	165565	130072	91274	170592	168686
		pmp000194	6''-O-Malonylgenistin	2.65697	1.40978	1.20219	0.0839716	up	518.106	C24H22O13	[M+H]+	1.03042e+06	483638	763211	275764	203593	377734
		pmp000413	Genistein-8-C-glucoside	0.569012	-0.813469			normal	432.106	C21H20O10	[M+H]+	173307	117413	75591.5	118856	362124	162788
		Lmhp003217	2'-Hydoxy-5-methoxyGenistein-O-rhamnosyl-glucoside	2.6936	1.42953	1.34981	0.00111366	up	624.169	C28H32O16	[M+H]+	4.38432e+06	4.97271e+06	4.13477e+06	1.31661e+06	1.71517e+06	1.97706e+06
		Lmyp006086	Prunetin-5-O-glucoside	1.53994	0.62287			normal	446.121	C22H22O10	[M+H]+	358110	151212	282297	155221	203188	155651
		Lmgp004474	Genistein-7-O-galactoside-rhamnose	0.795264	-0.330495			normal	578.164	C27H30O14	[M+H]+	183164	83848	186146	191851	115152	262818
Chalcones	11
		pme2960	Naringenin chalcone; 2',4,4',6'-Tetrahydroxychalcone	5.10096	2.35077	1.32923	0.0131977	up	272.068	C15H12O5	[M+H]+	2.27181e+06	1.54934e+06	1.65178e+06	535567	299159	238194
		mws2118	Phloretin-2'-O-glucoside (Phlorizin)	2.67155	1.41767	1.22675	0.0310707	up	436.137	C21H24O10	[M-H]-	553739	351038	584767	134198	150761	272599
		pmn001716	Carthamone	1.562	0.643396			normal	448.101	C21H20O11	[M-H]-	6.98282e+06	6.38047e+06	3.78551e+06	2.12155e+06	3.67879e+06	5.1784e+06
		Lmfn004093	Phloretin-4'-O-glucoside (Trilobatin)	2.00273	1.00197	1.00912	0.109385	up	436.137	C21H24O10	[M-H]-	2.9824e+06	1.78636e+06	2.46092e+06	814852	675608	2.11945e+06
		Zmpn004068	Phloretin-2'-O-(6''-O-xylosyl)glucoside	5.79331	2.53439	1.28727	0.0772806	up	568.179	C26H32O14	[M-H]-	70018.5	28556	71329.9	6487.56	12010.3	10829.8
		pme1201	Phloretin	3.70067	1.88779	1.29432	0.0553478	up	274.084	C15H14O5	[M-H]-	237709	121880	226466	41482.6	49177.3	67704.8
		Lmsn004797	3-Hydroxyphloretin-4'-O-glucoside	2.43813	1.28577	1.07579	0.104633	up	452.132	C21H24O11	[M-H]-	96886.9	41156.1	82703.1	23812	19820.9	46906.3
		HJN055	Dihydrocharcone-4'-O-glucoside	2.41482	1.27192	1.24772	0.0126788	up	436.137	C21H24O10	[M-H]-	2.05282e+06	1.56468e+06	2.21898e+06	625969	635150	1.15582e+06
		Lmlp006175	Isosalipurposide (Phlorizin Chalcone)	3.17967	1.66888	1.17821	0.082917	up	434.121	C21H22O10	[M+H]+	634652	284356	410723	134669	75035.2	208493
		Hmpn005101	Sieboldin	5.98037e-05	-14.0294	1.39388	0.0523102	down	452.132	C21H24O11	[M-H]-	9	9	9	135165	97516.2	218796
		Lmsn003297	3,4,2',4',6'-Pentahydroxychalcone-4'-O-glucoside	32.8569	5.03812	1.35029	0.0936991	up	450.116	C21H22O11	[M-H]-	3.67218e+06	3.55212e+06	8.70892e+06	74950.7	165320	244657
Other flavonoids	5
		Wbtn004381	1,3,6,8-tetrahydroxy-2,5-dimethoxyxanthen-9-one	32.4867	5.02178	1.37834	0.0554791	up	320.053	C15H12O8	[M-H]-	2.61928e+06	1.54477e+06	1.20343e+06	54929.1	41358.1	68933.4
		Wbtn006810	6,7-dihydroxy-1,3-dimethoxyxanthen-9-one	14.0266	3.81009	1.36008	0.0182448	up	288.063	C15H12O6	[M-H]-	536840	525691	777492	68180.9	37331.8	25668.6
		Wbtn006715	1,2,4,5,8-pentahydroxy-6-methylanthracene-9,10-dione	23.2816	4.54112	1.37764	0.0301112	up	302.043	C15H10O7	[M-H]-	2.59076e+06	1.67912e+06	3.1155e+06	129988	114546	72685
		Wbtp005759	1,2,5,7,8-pentahydroxy-3-methylanthracene-9,10-dione	9.62594	3.26693	1.36667	0.0464189	up	302.043	C15H10O7	[M+H]+	7.90827e+06	4.31618e+06	9.00745e+06	727294	707508	770896
		Wbtn005483	1,3,6-trihydroxy-2,5,7-trimethoxyxanthen-9-one	29.9678	4.90534	1.38667	0.0114212	up	334.069	C16H14O8	[M-H]-	1.82931e+06	1.57896e+06	1.26474e+06	63032	56044.5	36858.2
Note: Number 9.00E+00 represents a level so low as to barely be detectable.

## Sheet: Table S6
Supplementary Table S6. Fruit phenology for four accessions of Chinese cherry
Code	Origin	Days after full bloom (DAFB)	Stage	Phenology
HP31	Hongfei × Pujianghonghua	0	-	Full bloom
		37	Green (S1)	80% green, 20% light green
		41	Light green (S2)	80% light green, 20% green
		46	Pink blush (S3)	90% pink blush, 10% light green
		51	Red (S4)	90% red
		55	Dark red (S5)	100% dark red
HF	Hongfei	0	-	Full bloom
		37	Green (S1)	80% green, 20% light green
		43	Light green (S2)	80% light green, 20% green
		46	Pink blush (S3)	90% pink blush, 10% light green
		49	Light red (S4)	90% light red
		53	Red (S5)	100% red
HP5	Hongfei × Pujianghonghua	0	-	Full bloom
		36	Green (S1)	80% green, 20% light green
		40	Light green (S2)	80% light green, 20% green
		45	Pink blush (S3)	80% pink blush, 20% light green
		50	Orange red (S4)	90% orange red
		54	Light red (S5)	100% light red
PZB	Pengzhoubai	0	-	Full bloom
		37	Green (S1)	80% green, 20% light green
		43	Light green (S2)	80% light green, 20% green
		48	Straw yellow (S3)	90% straw yellow, 10% light green
		52	Yellow (S4)	90% yellow
		58	Yellow with blush (S5)	100% yellow with blush

## Sheet: Table S7
Supplementary Table S7. The primer sequences used for qRT-PCR
Name	Forward sequence (5'-3')	Reverse sequence (5'-3')
CpCHS	CTTTGGGCATCTCGGATTGG	CACCCCAATCCAGTCCATCT
CpCHI	CACTAACCGGCCAGCAATAC	GTGTGAAAAGGATCGAGGCG
CpF3H	TTCGTGGTCAATCTTGGGGA	CTCAAGGTCCCTGCTCATCT
CpF3'H	GCTCAAAGAGGATGCTGACG	TGGGCTAGAATCTTGGGGTG
CpDFR	TGTACGAGCACCCTAAAGCA	TCAACAGCCCCTACGAACAT
CpANS	TCCACCTTGCATACCCTGAG	AACTTCCTTCTCCAGCCTCC
CpUFGT	GTCCATACTGACCTCCTCCG	GCATGCGTGAGAAGACTGAG
CpGST	GGTCCATGCATGTGAGGAGA	CTCTCAGTCACCAAATGCCC
CpLAR	CTTCCACCGTTGGATCAGTT	GCCAATTTTCTTCTCCCACA
CpMYB4	CCTCGCCCTCATCATAAAAA	ATTAGACGAAGGAGCCGTCA
CpMYB10	AGACCTCAACCCCAAAGCTT	CCCTTCTTCCTCTAACGCGA
CpMYB20	GGAAAAAGTTGCAGGCTGAG	TTCTTGATGTGGGTGTTCCA
CpMYB306	CAAAGTGCAACAACCACACC	CAAAGTGCAACAACCACACC
CpbHLH1	GTTCACCAAAGGCTTGCTCA	CTCCTCCATTTCGTGCTTGG
CpNAC10	CACCGAAGAAGATGGAAGCG	ACCAGCTCCCCATCTTTCTC
CpERF106	TTCGAAACAAAACCCGAAAC	CCTTAGCGCTTCACCAGAAC
CpZIP4	GAGGTCACAGGGCTCCATTA	GAGGTCACAGGGCTCCATTA
β-Actin	AACCCTAAGGCAAACCGTGAGAAA	TCGAGAACAATACCCGTAGTACGACC
Ubiquitin	CTTCAGAAAGACCCACCCGCATC	TACAAGAAAAACACCTCCAGCAA
